30 **Abstract**

31 The mechanisms underlying memory loss associated with Alzheimer's disease and related  
32 dementias (ADRD) remain unclear, and no effective treatments exist. Fundamental studies have  
33 shown that a set of transcriptional regulatory proteins of the nuclear receptor 4a (Nr4a) family  
34 serve as molecular switches for long-term memory. Here, we show that Nr4a proteins regulate  
35 the transcription of a group of genes encoding chaperones that localize to the endoplasmic  
36 reticulum (ER), which function to traffic plasticity-related proteins to the cell surface during long  
37 lasting forms of synaptic plasticity and memory. Nr4a transcription factors and ER chaperones  
38 are linked to ADRD in human samples as well as mouse models, and overexpressing Nr4a1 or  
39 the ER chaperone Hspa5 ameliorates the long-term memory deficits in a tau-based mouse  
40 model of ADRD, pointing towards novel therapeutic approaches for treating memory loss. Thus,  
41 our findings establish protein folding in the ER as a novel molecular concept underlying long-  
42 term memory, providing new insights into the mechanistic basis of cognitive deficits in dementia.

43 **One-Sentence Summary**

44 Molecular approaches establish protein folding in the endoplasmic reticulum as a novel  
45 molecular concept underlying synaptic plasticity and memory, serving as a switch to regulate  
46 protein folding and trafficking, and driving cognitive deficits in neurodegenerative disorders.

47 **Keywords:** Dorsal hippocampus, Nr4a transcription factors, ER chaperones, spatial memory,  
48 Alzheimer's disease and related dementias.

49

50

51

52

53

54

55

56

## 57 **Introduction**

58 Impaired memory consolidation and the resulting long-term memory loss is an early symptom of  
59 Alzheimer’s disease and related dementias (ADRD)(1-3). Memory consolidation requires the  
60 transcription of new genes, in sophisticated spatial and temporal patterns, under the control of  
61 specific families of transcription factors (4-7). The largest class of transcription regulators in  
62 metazoans is composed of the nuclear receptor superfamily (8), which regulates diverse  
63 biological processes ranging from metabolism and reproduction to development and neuronal  
64 function. Among the several subclasses of nuclear receptors, the Nr4a subfamily (Nr4a1  
65 (NUR77, NGF-IB), Nr4a2 (NURR1/HZF-3/NOT/RNR1), and Nr4a3 (NOR1)) has emerged as a  
66 critical mediator of long-term memory (4, 5). Notably, these ligand-independent “orphan”  
67 receptors are robustly upregulated in the hippocampus within minutes after learning (3, 4). The  
68 learning-dependent expression of the Nr4a genes is regulated by histone acetylation, which is  
69 driven by recruitment of cAMP-response element binding (CREB) binding protein (CBP) (9) to  
70 CREB response elements in the promoters of these genes (10, 11). Blocking the expression or  
71 inactivating the transactivation function of Nr4a factors is sufficient to impair long-term memory  
72 (4, 5) and synaptic plasticity (12), whereas transgenic or pharmacological activation enhances  
73 long-term memory (13, 14). Moreover, Nr4a function is impaired in brain disorders characterized  
74 by debilitating cognitive impairment, ranging from schizophrenia, Parkinson’s disease to ADRD  
75 (3, 4, 15, 16). However, despite the critical importance of the Nr4a subfamily, the effector genes  
76 that these transcription factors regulate in the hippocampus during memory consolidation have  
77 remained elusive. Here, we identify ER chaperone genes as downstream effector genes  
78 regulated by these transcription factors, and we establish a role for chaperone function in long-  
79 term memory and synaptic plasticity. We further demonstrate that Nr4a transcription factors and  
80 the downstream ER chaperones that they regulate are key mediators of the long-term memory  
81 loss associated with ADRD, providing new candidate targets for the development of novel  
82 therapeutic interventions.

## 83 **Results**

### 84 ***Nr4a transcription factors regulate expression of genes encoding ER chaperones during*** 85 ***memory consolidation***

86 To identify effector genes regulated by the Nr4a subfamily during memory consolidation, we  
87 used transgenic mice that express a dominant-negative form of Nr4a1 (CaMKII $\alpha$ -tTA TetO-  
88 Nr4ADN) in excitatory neurons, such that the transcriptional activity of all three Nr4a family

## ER chaperones and long-term memory

89 members is blocked in these cells (4). To assess hippocampus-dependent memory, we  
90 examined the performance of Nr4ADN mice in spatial object recognition (SOR), a task that  
91 depends on the preference of mice to explore a spatially displaced object (17). In a 24 hr test of  
92 long-term memory, the control mice (CaMKII $\alpha$ -tTA), but not Nr4ADN mice (double transgenic:  
93 CaMKII $\alpha$ -tTA, TetO-Nr4ADN), exhibited a significant preference for the displaced object (**Fig.**  
94 **1A-B**). In contrast, in a 1 hr test of short-term memory, both the Nr4ADN and control mice  
95 showed a preference for the displaced object (**fig. S1**). Thus, Nr4ADN mice exhibit selective  
96 deficits in long-term spatial memory. To identify genes regulated by Nr4a transcription factors  
97 during memory consolidation, we trained Nr4ADN and control littermates in the SOR task and  
98 extracted total RNA from the dorsal hippocampus 2 hr after training (**Fig. 1C**). We chose this  
99 time point to identify effector genes targeted by the Nr4a subfamily of transcription factors,  
100 which are immediate early genes induced within minutes after training. This analysis revealed  
101 54 differentially expressed genes (DEGs) (**Fig. 1D, table S1**) in Nr4ADN versus control mice,  
102 with 40 downregulated and 14 upregulated genes in Nr4ADN mice after learning (**Fig. 1D**).

103 Enrichment network analysis was used to identify the pathways most represented among the  
104 down- and upregulated genes. The downregulated pathways included protein processing in the  
105 ER, chaperone binding, protein disulfide isomerase activity and several other pathways related  
106 to protein folding in the ER (**Fig. 1E**). The upregulated pathways included the poly-pyrimidine  
107 tract binding pathway linked to *Cirbp* expression, a RNA binding protein associated with  
108 translational control (**Fig. 1F**). Protein-protein interaction analysis of the downregulated genes in  
109 Nr4ADN mice identified a significant cluster composed of nine chaperone proteins (*Hspa5*,  
110 *Hsp90b1*, *Pdia3*, *Pdia4*, *Pdia6*, *Sdf2l1*, *Dnajb11*, *Hyou1*, and *Calr*, **fig. S2**). All of these are  
111 components of a large ER multiprotein chaperone complex known to bind nascent proteins (18).

112 Next, we performed RNA-seq using the dorsal hippocampus from control mice trained in SOR  
113 (SOR training + 2 hr) or untrained mice (homecage, HC). RNA-seq analysis revealed that  
114 learning increased the expression of 42 genes and reduced expression of 9 genes (**fig. S3,**  
115 **table S2**). Comparison of this gene expression data with the data from control and Nr4ADN  
116 mice after learning (**Fig. 1D**) identified 15 genes induced in control mice after learning that were  
117 downregulated in Nr4ADN mice. These genes included ER chaperone genes *Hspa5*, *Pdia4*,  
118 *Pdia6*, *Sdf2l1*, and *Dnajb11* (**Fig. 2A**). We next analyzed Nr4a1 occupancy on two of these  
119 candidate genes that are critical for protein folding (*Hspa5* and *Pdia6*)(18) using data from a  
120 previously published Nr4a1 chromatin immunoprecipitation followed by sequencing (ChIP-seq)  
121 study (19). The promoters of the *Hspa5* and *Pdia6* genes were found to be enriched for Nr4a1

## *ER chaperones and long-term memory*

122 binding motifs (**fig. S4**), suggesting that this transcription factor directly regulates the expression  
123 of these genes. We further examined the expression profiles of these two candidate genes  
124 during the first 4 hr after learning in wild-type (C57BL/6J) mice revealing that spatial learning  
125 induced the expression of both *Hspa5* and *Pdia6* genes (**Fig. 2B-C**). Subsequent investigation  
126 of these two candidate genes in Nr4ADN mice confirmed that their regulation by the Nr4a  
127 proteins occurs only after learning (**Fig. 2D-E, fig. S5**). Such regulation was not observed when  
128 expression of the Nr4ADN transgene was suppressed by treatment of the mice with doxycycline  
129 (Dox; **fig. S6**). These convergent data demonstrate that Nr4a transcription factors regulate the  
130 expression of a discrete set of ER chaperone genes during memory consolidation. Even though  
131 these ER chaperones are known regulators of ER stress, Nr4ADN mice do not exhibit elevated  
132 levels of key ER stress markers (p-IRE1, ATF4 and ATF6) following learning (**fig. S7**), and we  
133 see that only a subset of genes linked to the unfolded protein response is regulated by Nr4a  
134 factors following learning.

135 Chaperones, such as *Hspa5* and *Pdia6*, are found in synaptosomes, where they facilitate the  
136 folding and assembly of nascent polypeptides, as well as the trafficking of proteins to the  
137 neuronal surface (20, 21). The synaptic abundance of *Hspa5* and *Pdia6* was significantly lower  
138 after SOR training in Nr4ADN mice compared to controls (**Fig. 2F-G, fig. S8**). Previous studies  
139 have demonstrated that *Hspa5* plays a critical role in regulating the postsynaptic membrane  
140 delivery of the N-methyl-D-aspartate (NMDA) receptor subunit GluN2A in response to neuronal  
141 stimulation (20). Therefore, we next investigated whether Nr4a factors might regulate the  
142 surface expression of GluN2A. We expressed Nr4ADN (or eGFP as a control) in primary  
143 hippocampal neurons using a viral-based approach and assessed the distribution of GluN2A  
144 receptors following KCl-mediated neuronal depolarization. We found significant increases in  
145 surface levels of GluN2A in eGFP-transduced cells after neuronal depolarization (**Fig. 2H-I**),  
146 whereas Nr4ADN-transduced cells failed to exhibit activity-induced trafficking of GluN2A (**Fig.**  
147 **2H-I**). We also found that Nr4ADN-expressing neurons show a significant decrease in activity-  
148 induced post-synaptic surface localization of GluN2A, as evidenced by the reduced co-  
149 localization of GluN2A with the post-synaptic density protein PSD95 (**Fig. 2J-K**). Next, we  
150 investigated whether rescue of *Hspa5* expression would be sufficient to increase post-synaptic  
151 localization of GluN2A in Nr4ADN-expressing neurons. Overexpression of *Hspa5* increased  
152 PSD95 co-localization with GluN2A in Nr4ADN-expressing neurons (**Fig. 2L-M**). Our findings  
153 demonstrate that the regulation of chaperone protein gene expression, such as *Hspa5*, by Nr4a

154 transcription factors is critical for the folding and synaptic trafficking of receptor proteins that are  
155 key to synaptic plasticity.

156 ***Restoring protein chaperone function prevents long-term memory and synaptic plasticity***  
157 ***deficits in Nr4ADN mice***

158 Chaperones fold nascent proteins into functional three-dimensional conformations (22), and  
159 their upregulation after learning (**Fig. 2A-C**) is essential for the activity-dependent processing  
160 and trafficking of key synaptic proteins (**Fig. 2H-M**). Given the roles of chaperones in protein  
161 folding, we next performed experiments to determine whether the deficits in memory and  
162 synaptic plasticity observed in Nr4ADN mice are related to impairment of this process. First, we  
163 examined the effect of phenylbutyrate (PBA), a hydrophobic chemical chaperone, in Nr4ADN  
164 mice. PBA interacts with the exposed hydrophobic regions of nascent proteins to facilitate  
165 folding (23), partially reverses the mis-localization of proteins (24), and facilitates delivery of  
166 proteins that are critical for neuronal plasticity to the cell surface (25-27). Importantly, PBA has  
167 shown promise in rescuing cognitive impairment in several mouse models of neurodegenerative  
168 diseases (28-31), and these neuroprotective effects have been attributed to its chaperone  
169 activity (28, 32). Notably, systemic delivery of a single dose of PBA to Nr4ADN mice  
170 immediately following SOR training rescued long-term memory deficits (**Fig. 3A**); the same  
171 treatment of control mice did not augment long-term memory (**Fig. 3B**). Because PBA functions  
172 as both a molecular chaperone and an inhibitor of histone deacetylases (HDACs), we confirmed  
173 that this rescue was not due to changes in expression of Hspa5 and Pdia6 in Nr4ADN mice (**fig.**  
174 **S9**). Additionally, sodium butyrate (NaBu), an HDAC inhibitor that has no molecular chaperone  
175 activity (28), failed to rescue memory in Nr4ADN mice (**Fig. 3A**). This finding is consistent with  
176 our previous observation that broad HDAC inhibition is not sufficient to reverse the memory  
177 deficits in Nr4ADN mice (4).

178 We previously showed that Nr4ADN mice exhibit deficits in a form of persistent, protein  
179 synthesis-dependent long-term potentiation (LTP) induced by repeated spaced high-frequency  
180 stimulation of the hippocampal CA1-Schaffer collateral synapses (12). Given that PBA treatment  
181 reversed long-term memory deficits in Nr4ADN mice, we examined its effects on this long-  
182 lasting form of LTP. Following 20 minutes of stable baseline field-excitatory postsynaptic  
183 potentials (EPSPs) recordings, hippocampal slices from Nr4ADN mice were treated by bath  
184 application of 2 mM PBA (dissolved in the artificial cerebrospinal fluid, aCSF). After 40 min of  
185 PBA treatment, long-lasting LTP was induced using a spaced 4-train stimulation protocol (four



## *ER chaperones and long-term memory*

186 100 Hz, 1-sec trains separated by 5 min). Potentiation in slices from Nr4ADN mice decayed  
187 quickly, thus showing deficits in the persistence of LTP, as reported in our previous study (12).  
188 Treatment with PBA rescued the deficits in long-lasting LTP in Nr4ADN slices leading to  
189 persistently enhanced potentiation compared to the vehicle group (**Fig. 3C-D**). At the  
190 concentration used, PBA did not have significant effects on the pre-induction baseline (**Fig. 3C**).  
191 These findings demonstrate that PBA treatment reverses the deficits in long-lasting synaptic  
192 plasticity and memory in Nr4ADN mice by promoting the folding of newly synthesized proteins.

193 To define the specific role of the molecular chaperone Hspa5 in the memory deficits observed in  
194 Nr4ADN mice, we reinstated Hspa5 expression selectively in hippocampal excitatory neurons  
195 using a viral approach and performed behavioral studies two weeks after viral infusion (**Fig. 3E-**  
196 **G**). The level of overexpression achieved was sufficient to reverse the long-term spatial memory  
197 deficits observed in Nr4ADN mice (**Fig. 3H**), supporting the idea that Hspa5 is downstream of  
198 Nr4a transcription factors (**Fig. 3I**). These findings suggest that the deficits in synaptic plasticity  
199 and long-term memory in Nr4ADN mice are due to disruption of a chaperone activity required  
200 for the folding of newly synthesized proteins. Overall, we conclude that the activity induced  
201 regulation of ER chaperone Hspa5 by Nr4a transcription factors is essential for the native  
202 protein folding required for consolidation of long-term memory.

### 203 ***Activation of Nr4a1 or ER chaperone function ameliorates memory impairments in an*** 204 ***ADRD mouse model***

205 Nr4a transcription factors were previously implicated in A $\beta$  aggregation and memory deficits  
206 (33). Therefore, we investigated the expression of Nr4a transcripts in the hippocampus of ADRD  
207 patients with increasing grades of pathology. Using a database of RNA sequencing and  
208 pathological findings from post-mortem brain tissue from patients and healthy controls in The  
209 Allen Brain Institute study of Aging, Dementia, and Traumatic Brain Injury (34), we examined the  
210 relationship between hippocampal expression of *NR4A* subfamily members across increasing  
211 Cerad (Consortium to Establish a Registry for Alzheimer's Disease) score, a neuropsychological  
212 assessment of the progression of AD, and Braak stage, a measure of the distribution and  
213 pathological burden of neurofibrillary tangles (NFTs). We found that levels of expression of  
214 *NR4A1* and *NR4A2* were negatively correlated with both the Cerad scores (**Fig. 4A**) and Braak  
215 stages (**Fig. 4B**), both measures of the severity of ADRD pathology, whereas *NR4A3* was not  
216 significantly correlated with disease pathologies. Consistent with our findings, *NR4A2* protein  
217 expression is reduced in post-mortem AD hippocampus at Braak stage VI (33).

## *ER chaperones and long-term memory*

218 Cognitive impairment is a significant feature of ADRD, and we hypothesized that NR4A  
219 downregulation might be related to the compromise in cognitive abilities. To examine this in a  
220 mouse model of ADRD, we used the rTg4510 mouse, which overexpresses mutant human tau  
221 (tau P301L) exclusively in excitatory neurons (35, 36). These mice develop tangle-like  
222 inclusions (35, 36) and show pathological hyper-phosphorylation of tau proteins (AT8) in the  
223 dorsal hippocampus starting at 3-4 months age (**Fig. 4C**). These mice have deficits in spatial  
224 learning in the Morris water maze (MWM), contextual fear conditioning (35-38), and long-term  
225 spatial memory in the SOR task (**Fig. 4D**). Doxycycline treatment prevents these memory  
226 deficits (**Fig. 4D**), demonstrating that it is the expression of the mutant tau transgene and not  
227 the transgene insertion site (39) that drives the tauopathy-like phenotype. As in the case of the  
228 human post-mortem data, the expression of both *Nr4a1* and *Nr4a2* was downregulated in the  
229 dorsal hippocampus of rTg4510 mice after SOR training (**Fig. 4E**). These findings validate the  
230 appropriateness of utilizing this mouse line as a model for Nr4a dysregulation. Furthermore, we  
231 found that *Hspa5* and *Pdia6* were downregulated in the dorsal hippocampus of rTg4510 mice  
232 after SOR training (**Fig. 4F**). To determine the extent to which Nr4a transcription factors  
233 contribute to the memory impairment seen in rTg4510 mice, we overexpressed *Nr4a1* in the  
234 dorsal hippocampus of adult mice (**Fig. 4G-H**). This reversed the deficits in long-term spatial  
235 memory normally observed in rTg4510 mice (**Fig. 4I**). Lastly, to determine the role of *Hspa5*  
236 chaperone in ADRD associated memory impairment, we overexpressed *Hspa5* in the dorsal  
237 hippocampus of rTg4510 mice. Strikingly, *Hspa5* overexpression ameliorated long-term memory  
238 deficits in rTg4510 mice (**Fig. 4J**). These findings link the function of the Nr4a family of  
239 transcription factors to the cognitive deficits associated with neurodegenerative disorders, and  
240 they suggest that targeting the Nr4a family and their downstream effector genes would be  
241 beneficial in the treatment of memory deficits associated with ADRD.

## 242 **Discussion**

243 Here, we show that Nr4a transcription factors act during memory consolidation to drive the  
244 expression of genes encoding chaperones that are part of a multiprotein complex within the ER,  
245 thereby facilitating folding of the proteins into their functional conformations (18). This study  
246 provides functional evidence that these chaperones are involved in synaptic plasticity and long-  
247 term memory. The results demonstrating that long-term memory can be reversed in Nr4ADN  
248 mice by either application of the chemical chaperone PBA or overexpression of *Hspa5* reveal  
249 that the protein folding machinery plays a critical role in memory consolidation. Our work in  
250 hippocampal neurons identifies the synaptic membrane protein GluN2A as a candidate target



## *ER chaperones and long-term memory*

251 protein whose surface trafficking is regulated by Nr4a1-driven expression of Hspa5. Nr4a1 was  
252 previously shown to be involved in regulating dendritic spine density (40), consistent with the  
253 hypothesis that the target genes of this transcription factor impact synaptic structure and  
254 function. Our identification of ER chaperones as effector genes during memory consolidation  
255 provides a novel link between the induction of gene expression and protein synthesis, which are  
256 hallmarks of memory consolidation and the synaptic plasticity that leads to modification of  
257 neural circuits and behavioral alterations.

258 Our study extends these fundamental findings on the molecular mechanisms of memory,  
259 advancing our understanding of memory loss associated with neurodegenerative disorders by  
260 identifying changes in expression of the Nr4a family of transcription factors in both human AD  
261 brains and a mouse model of ADRD. Tau transgenic models and human tauopathy data exhibit  
262 widespread loss of heterochromatin (41), impaired chromatin remodeling and nuclear lamina  
263 formation (42). Levels of the lysine acetyl-transferase CBP are reduced in THY-Tau22 mutant  
264 mice (3) and in human AD patient samples (43). CBP and histone acetylation regulate the  
265 expression of Nr4a family genes, and consistent with our findings that overexpression of *Nr4a1*  
266 reverses memory deficits in tau mutant mice, both the pharmacological activation of CBP (3, 44,  
267 45) and the inhibition of HDAC activity restore memory in several mouse models of ADRD (46-  
268 48). Although the exact mechanisms underlying the transcriptional alterations in  
269 neurodegenerative disorders remain to be identified, they represent attractive targets for the  
270 development of drugs to ameliorate cognitive deficits, which are a debilitating aspect of ADRDs.  
271 Our finding that overexpression of Nr4a1 or Hspa5 chaperone reverses memory loss in a tau-  
272 based model of ADRD supports this as a novel therapeutic approach.

273 The work described here identifies ER chaperone proteins as critical molecular regulators of  
274 memory storage. ER chaperones have been studied mainly for their roles in ER stress and the  
275 unfolded protein response; their role in memory consolidation is underexplored. Our work here  
276 links a subset of these ER chaperones, including Hspa5 and protein disulfide isomerases, to  
277 protein folding and trafficking within critical time windows during memory consolidation, laying  
278 the groundwork for future experiments to identify additional downstream targets of these ER  
279 chaperones, with promises of a more complete understanding of the fundamental molecular  
280 mechanisms of memory consolidation that go awry in neurodegenerative disorders.

## 281 **Figure legends**

282 **Figure 1. A multiprotein ER chaperone complex is downstream of Nr4a transcription**  
283 **factors during memory consolidation. (A)** Schematic depicting spatial object recognition  
284 (SOR) procedure. Mice expressing the tetracycline transactivator (tTA) protein under the  
285 CaMKII $\alpha$  promoter (CaMKII $\alpha$ -tTA: control mice) and counterparts additionally expressing both  
286 CaMKII $\alpha$ -tTA and the dominant-negative mutant Nr4A1 under the control of TetO promoter  
287 (CaMKII $\alpha$ -tTA, TetO-Nr4A dominant negative: Nr4ADN mice) were trained in SOR and then  
288 tested after 24 hr. **(B)** Preference for the displaced object (DO, dotted line marks 33% chance)  
289 during the 24-hr test session relative to training. Two-way ANOVA: significant main effect of  
290 genotype ( $F_{(1, 21)} = 18.42$ ,  $p = 0.0003$ ) and significant main effect of sessions ( $F_{(1, 21)} = 8.417$ ,  
291  $p = 0.0085$ ). Sidak's multiple comparisons test: \*\* $p = 0.0054$  (control mice, Train versus 24-hr  
292 Test), \*\* $p = 0.0011$  (control 24-hr Test versus Nr4ADN 24-hr Test). Control:  $n = 11$  (3F) Nr4ADN:  
293 12 (4F). **(C)** Schematic depiction of RNA-seq experiment. Nr4ADN and control male mice were  
294 trained in SOR and euthanized 2 hr after the final training. mRNA was harvested from the dorsal  
295 hippocampus and processed for the preparation of an RNA-seq library. **(D)**, Volcano plot  
296 illustrating significance (y-axis) and magnitude (x-axis) of the downregulation (blue) and  
297 upregulation (red) of genes in Nr4ADN mice. **(E-F)**, Functional groupings of network of enriched  
298 categories for genes whose differential expression (**E**, downregulation; **F**, upregulation) was  
299 significant, using the ClueGO and CluePedia plugins of the Cytoscape software. Gene Ontology  
300 terms include Molecular Functions (MF) and Kyoto Encyclopedia of Genes and Genomes  
301 (KEGG) and are represented as nodes ( $\kappa$  score level  $\geq 0.4$ ), with node size representing the  
302 significance of the term enrichment. Only the most significant term in each group is presented in  
303 bold.

304 **Figure 2. A subset of the genes downstream of Nr4a are induced by learning. (A)**  
305 Quadrant plot based on total RNA seq data. Genes induced by learning were identified based  
306 on comparison of genes regulated in dorsal hippocampus of control male mice 2 hr after SOR  
307 (tTA<sup>+</sup> Nr4ADN<sup>-</sup>  $n = 2$ , tTA<sup>-</sup> Nr4ADN<sup>-</sup>  $n = 2$ ) and homecage control mice (tTA<sup>+</sup> Nr4ADN<sup>-</sup>  $n = 2$ , tTA<sup>-</sup>  
308 Nr4ADN<sup>-</sup>  $n = 2$ ). Quadrant plot comparing genes regulated by learning in control mice experiment  
309 to genes regulated by Nr4ADN after learning. Induction of genes normally upregulated by SOR  
310 is downregulated in Nr4ADN mice (labeled points). Size, opacity, and color intensity of each  
311 point reflect the minimum FDR value for a gene between each experiment. **(B-C)** Expression of  
312 the **(B)** *Hspa5* and **(C)** *Pdia6* mRNAs in C57BL/6J male mice trained in SOR and euthanized at  
313 the indicated times after final training trial (1 hr:  $n = 9$ ; 2 hr:  $n = 9$ ; 3 hr:  $n = 9$ ; and 4 hr:  $n = 9$ ),  
314 expressed as fold difference from that in mice handled only in the homecage (baseline controls,

*ER chaperones and long-term memory*

315 n=10). One-way ANOVA: *Hspa5*:  $F_{(4, 41)}=13.00$ ,  $p<0.0001$ , Sidak's multiple comparisons tests:  
316 \*\*\* $p<0.0001$  (HC versus 1 hr), \*\*\* $p<0.0001$  (HC versus 2 hr), \*\*\* $p<0.0001$  (HC versus 3 hr),  
317 \* $p=0.0158$  (HC versus 4 hr), *Pdia6*:  $F_{(4, 41)}=8.442$ ,  $p<0.0001$ , Sidak's multiple comparisons tests:  
318 \*\*\* $p=0.0008$  (HC versus 1 hr), \*\*\* $p=0.0001$  (HC versus 2 hr), \*\*\* $p<0.0001$  (HC versus 3 hr),  
319 \*\* $p=0.0054$  (HC versus 4 hr). **(D-E)**, Downregulation of gene expression at 2 hr after SOR  
320 training, in male Nr4ADN (n=9) and control (n=10) mice, as validated by qPCR. Unpaired t-test:  
321  $t_{(17)}=3.305$ , \*\* $p=0.0042$  (*Hspa5*),  $t_{(17)}=3.630$ , \*\* $p=0.0021$  (*Pdia6*). **(F-G)**, Quantification of  
322 Western blot of lysates of synaptosomes isolated from the dorsal hippocampus of male Nr4ADN  
323 (n=4) and control mice 2 hr after SOR training (n=4). Unpaired t-test:  $t_{(6)}=4.011$ , \*\* $p=0.0070$   
324 (*Hspa5*),  $t_{(6)}=2.982$ , \* $p=0.0246$  (*Pdia6*). **(H-K)**, Cultured neurons were transduced with eGFP or  
325 Nr4ADN on DIV 16 or 17 and stimulated with KCl before live staining. **(H)** Co-staining for  
326 dendrites (MAP2 antibody) and surface GluN2A by immunofluorescence (IF) in transduced cells  
327 following KCl stimulation. Scale bar: 10  $\mu\text{m}$ . **(I)** Quantification of surface staining for GluN2A in  
328 **H**, as mean fluorescence intensity. Mixed effect analysis: significant AAV construct x treatment  
329 interaction  $F_{(1, 157)}=38.25$ ,  $p<0.0001$ . Sidak's multiple comparisons test: \*\*\* $p<0.0001$  (control  
330 eGFP versus stimulated eGFP), \*\*\* $p<0.0001$  (stimulated eGFP versus stimulated Nr4ADN). **(J)**  
331 Co-staining for surface GluN2A and PSD95, by IF in transduced cells following KCl stimulation.  
332 Scale bar: 10  $\mu\text{m}$ . **(K)** Quantification of surface GluN2A and PSD95 co-localization. Mixed  
333 effect analysis: significant AAV construct x treatment interaction:  $F_{(1, 69)}=14.57$ ,  $p=0.0003$ .  
334 Sidak's multiple comparison tests: \*\* $p=0.0026$  (control eGFP versus stimulated eGFP),  
335 \*\* $p=0.0012$  (stimulated eGFP versus stimulated Nr4ADN). **(L)** Cultured neurons were  
336 transduced with Nr4ADN or Nr4ADN+*Hspa5* on DIV 16 or 17 and stimulated with KCl before  
337 live staining. Co-staining for surface GluN2A and PSD95, by IF in transduced cells following KCl  
338 stimulation. Scale bar: 10  $\mu\text{m}$ . **(M)** Quantification of surface GluN2A and PSD95 co-localization.  
339 Unpaired t-test:  $t_{(30)}=3.727$ , \*\*\* $p=0.0008$ .

340 **Figure 3. The Nr4a proteins contribute to memory through downstream chaperone**  
341 **proteins. (A)** Nr4ADN mice were *i.p.* injected with phenylbutyrate (PBA, 200mg/kg, n=9),  
342 sodium butyrate (NaBu, 200mg/kg, n=8 (2F)) or vehicle (n=17 (2F)) immediately after SOR  
343 training and tested for long-term memory 24 hr later. Two-way ANOVA: significant treatment x  
344 sessions interaction ( $F_{(2, 31)}=4.207$ ,  $p=0.0242$ ), Sidak's multiple comparisons tests: \*\* $p=0.0011$   
345 (Nr4ADN mice-PBA, train versus 24-hr test), \*\* $p=0.0036$  (Nr4ADN-PBA 24 hr test versus  
346 Nr4ADN-Vehicle 24 hr test) and \*\* $p=0.0084$  (Nr4ADN-PBA 24 hr test versus Nr4ADN-NaBu 24  
347 hr test). **(B)** Male control mice were *i.p.* injected with PBA, (200mg/kg, n=6) or vehicle (n=6)

## ER chaperones and long-term memory

348 immediately after completion of SOR training and tested for long-term memory 24 hr later. Two-  
349 way ANOVA: significant main effect of sessions  $F_{(1, 10)}=33.46$ ,  $p=0.0002$ , Sidak's multiple  
350 comparisons tests:  $*p=0.0110$  (control mice-Vehicle, Train versus Test),  $**p=0.0018$  (control  
351 mice-PBA, train versus test). **(C-D)**, Effects of PBA on persistence of LTP, as demonstrated by  
352 representative fEPSP slope over final 20 min of recordings. Expression of Nr4ADN attenuates  
353 persistence of LTP in hippocampal slices (Nr4ADN-veh), while bath-treatment with 2 mM PBA  
354 rescues these LTP deficits (Nr4ADN-PBA) (Two-way repeated measures ANOVA, effect of PBA  
355 treatment  $F_{(1,12)} = 8.125$ ,  $p = 0.0146$ ). The mean fEPSP slope over the last 20 min of the  
356 recordings was enhanced in PBA-treated slices compared to vehicle-treated slices (PBA-  
357 treated:  $187.3 \pm 16.2\%$ ,  $n = 7$  slices, 4 mice; vehicle-treated:  $124.6 \pm 14.9\%$ ,  $n = 7$  slices, 5  
358 mice; Unpaired t-test,  $*p = 0.0146$ ). Treatment with 2 mM PBA had no significant effect on the  
359 baseline responses (Pre-drug baseline, 20 min:  $100.1 \pm 0.13\%$ ; post-drug pre-induction  
360 baseline, 20 min:  $90.63 \pm 6.6\%$ , Paired t-test,  $p = 0.2094$ ). The representative fEPSP traces  
361 shown are sampled at baseline (black) and at the end of the recording (red). Scale bar 2 mV, 10  
362 ms. Error bars indicate SEM. **(E)** Schematic of viral constructs used to drive expression of  
363 Hspa5 following infusion into dorsal hippocampus of male C57BL/6J mice. AAV<sub>9</sub>-CaMKII $\alpha$ -  
364 eGFP served as vector control and AAV<sub>9</sub>-CaMKII $\alpha$ -Hspa5-Tavi was used to drive expression of  
365 Hspa5 in excitatory neurons. The Tavi-tag can be identified by an antibody against a consensus  
366 biotinylation sequence and has a TEV sequence that can be used to cleave it from Hspa5. **(F)**  
367 Western blot of synaptosomes, showing mild Hspa5-Tavi expression within one week of  
368 infusion, and expression approximately equal to that of endogenous Hspa5 within 2 weeks of  
369 infusion. **(G)** Quantitation of data in **F**. **(H)** Long-term memory (24 hr) assessment of Nr4ADN  
370 mice infused with AAV-eGFP or AAV-Hspa5-Tavi into dorsal hippocampus. Two-way ANOVA:  
371 significant AAV type x session interaction:  $F_{(1, 16)} = 6.985$ ,  $p=0.0177$ , Sidak's multiple  
372 comparisons tests:  $**p= 0.0022$  (AAV-Hspa5, Train versus Test),  $***p= 0.0002$  (AAV-Hspa5,  
373 24h-test versus AAV-eGFP, 24-hr test) while eGFP infused Nr4ADN mice showed no  
374 preference towards the DO. AAV-Hspa5:  $n=10$  (4F) and AAV-eGFP:  $n=8$  (3F). **(I)** Schematic  
375 illustration of model wherein learning-induced expression of Nr4a1 drives Hspa5 expression in  
376 nucleus to initiate protein folding in the ER that enables the expression of functional proteins at  
377 the synapse surface.

378 **Figure 4. Restoration of Nr4a1 or ER chaperone function reverses memory deficits in a**  
379 **mouse model of AD/DRD.** **(A-B)** Expression profiles of *NR4A1*, *NR4A2* and *NR4A3* in the  
380 hippocampus, from the Allen Brain Institute study of Aging, Dementia, and Traumatic Brain

*ER chaperones and long-term memory*

381 Injury, correlated with **(A)** Cerad scores, which reflect the density of neuritic plaques, and **(B)**  
382 Braak stages, which reflect the severity of neurofibrillary tangles. **(C)** Schematic depiction of  
383 control (CaMKII $\alpha$ -tTA) or rTg4510 (CaMKII $\alpha$ -tTA and TetO-hMAPT P301L) mice, and western  
384 blots of tau phosphorylation (AT8, phosphorylation at both Ser202 and Thr205) in the dorsal  
385 hippocampus in the presence or absence of doxycycline (Dox). **(D)** Long-term memory in  
386 rTg4510 and control mice at 4 mo of age, following training in SOR. Two-way ANOVA:  
387 significant main effect of genotype/treatment ( $F_{(2, 29)}=4.792$ ,  $p=0.0159$ ), significant main effect of  
388 sessions ( $F_{(1, 29)}=9.221$ ,  $p=0.0050$ ). Sidak's multiple comparisons test: \*\* $p=0.0096$  (control mice,  
389 Train versus Test), \* $p=0.0439$  (rTg4510-Dox mice, Train versus Test), \*\* $p=0.0016$  (rTg4510  
390 mice, 24h test versus control mice, 24h test) and \* $p=0.0140$  (rTg4510 mice, 24h test versus  
391 rTg4510 Dox, 24-hr test), control  $n=11$  (3F), rTg4510  $n=8$  (4F) and rTg4510+Dox  $n=13$  (7F). **(E-**  
392 **F)** rTg4510 and control mice ( $n=9$  per group) were trained in SOR, and 2 hr later the dorsal  
393 hippocampus was collected and processed for RNA extraction and the analysis of gene  
394 expression. **(E)** *Nr4a* sub-family gene expression: Unpaired t-test: *Nr4a1*:  $t_{(16)}=4.878$ ,  
395 \*\*\* $p=0.0002$ ; *Nr4a2*:  $t_{(16)}=2.621$ , \* $p=0.0185$ . **(F)** *Hspa5* and *Pdia6* gene expression: Unpaired t  
396 test: *Hspa5*:  $t_{(16)}=3.692$ , \*\* $p=0.0020$ ; *Pdia6*:  $t_{(16)}=4.177$ , \*\*\* $p=0.0007$ . **(G)** Schematic depiction of  
397 AAV constructs used to infuse into dorsal hippocampus of 3 mo-old rTg4510 mice. **(H)** Western  
398 blot showing expression of virus-transduced Nr4a1-HA in dorsal hippocampus 4 wk following  
399 infusion. **(I)** rTg4510 mice 3 mo of age were infused with AAV $_9$ CaMKII $\alpha$ -Nr4a1-HA or control  
400 vector (AAV $_9$ -CaMKII $\alpha$ -eGFP), and 4 wk later they were trained in SOR. Long-term memory was  
401 tested 24 hr after the training session. Two-way ANOVA: significant main effect of AAV-type  
402 infusion ( $F_{(1, 13)}=6.597$ ,  $p=0.0234$ ), Sidak's multiple comparison tests: \* $p=0.0127$  (AAV-Nr4a1,  
403 24-hr test versus AAV-eGFP, 24-hr test) and \* $p=0.0489$  (AAV-Nr4a1 Train versus AAV-Nr4a1  
404 24-hr Test), AAV-Nr4A1:  $n=8$  and AAV-eGFP:  $n=7$ . **(J)** rTg4510 mice 3.5 mo of age were  
405 infused with AAV $_9$ CaMKII $\alpha$ -Hspa5-Tavi or control vector (AAV $_9$ -CaMKII $\alpha$ -eGFP), and 2 wk later  
406 they were trained in SOR. Long-term memory was tested 24 hr after the training session. Two-  
407 way ANOVA: significant Session x AAV interaction  $F_{(1, 10)}=8.767$ ,  $p=0.0143$ , Sidak's multiple  
408 comparison tests: \* $p=0.0419$  (AAV-eGFP Test versus AAV-Hspa5 Test) and \* $p=0.0419$  (AAV-  
409 Hspa5 Train versus AAV-Hspa5 Test), AAV-eGFP:  $n=6$  (3F) and AAV-Hspa5:  $n=6$  (3F).

410

411

412



413 **References**

- 414 1. D. S. Roy *et al.*, Memory retrieval by activating engram cells in mouse models of early  
415 Alzheimer's disease. *Nature* **531**, 508-512 (2016).
- 416 2. P. S. J. Weston *et al.*, Accelerated long-term forgetting in presymptomatic autosomal  
417 dominant Alzheimer's disease: a cross-sectional study. *Lancet Neurol* **17**, 123-132  
418 (2018).
- 419 3. S. Chatterjee *et al.*, Reinstating plasticity and memory in a tauopathy mouse model with  
420 an acetyltransferase activator. *EMBO Mol Med* **10**, (2018).
- 421 4. J. D. Hawk *et al.*, NR4A nuclear receptors support memory enhancement by histone  
422 deacetylase inhibitors. *J Clin Invest* **122**, 3593-3602 (2012).
- 423 5. S. E. McNulty *et al.*, Differential roles for Nr4a1 and Nr4a2 in object location vs. object  
424 recognition long-term memory. *Learn Mem* **19**, 588-592 (2012).
- 425 6. A. Marco *et al.*, Mapping the epigenomic and transcriptomic interplay during memory  
426 formation and recall in the hippocampal engram ensemble. *Nat Neurosci* **23**, 1606-1617  
427 (2020).
- 428 7. C. M. Alberini, E. R. Kandel, The regulation of transcription in memory consolidation.  
429 *Cold Spring Harb Perspect Biol* **7**, a021741 (2014).
- 430 8. A. L. Bookout *et al.*, Anatomical profiling of nuclear receptor expression reveals a  
431 hierarchical transcriptional network. *Cell* **126**, 789-799 (2006).
- 432 9. S. Chatterjee *et al.*, The CBP KIX domain regulates long-term memory and circadian  
433 activity. *BMC Biol* **18**, 155 (2020).
- 434 10. C. G. Vecsey *et al.*, Histone deacetylase inhibitors enhance memory and synaptic  
435 plasticity via CREB:CBP-dependent transcriptional activation. *J Neurosci* **27**, 6128-6140  
436 (2007).
- 437 11. M. D. Carpenter *et al.*, Nr4a1 suppresses cocaine-induced behavior via epigenetic  
438 regulation of homeostatic target genes. *Nat Commun* **11**, 504 (2020).
- 439 12. M. S. Bridi, T. Abel, The NR4A orphan nuclear receptors mediate transcription-  
440 dependent hippocampal synaptic plasticity. *Neurobiol Learn Mem* **105**, 151-158 (2013).
- 441 13. J. L. Kwapis *et al.*, HDAC3-mediated repression of the Nr4a family contributes to age-  
442 related impairments in long-term memory. *J Neurosci*, (2019).
- 443 14. S. Chatterjee *et al.*, Pharmacological activation of Nr4a rescues age-associated memory  
444 decline. *Neurobiol Aging* **85**, 140-144 (2020).
- 445 15. R. Skerrett, T. Malm, G. Landreth, Nuclear receptors in neurodegenerative diseases.  
446 *Neurobiol Dis* **72 Pt A**, 104-116 (2014).
- 447 16. S. G. Jeon *et al.*, The Critical Role of Nurr1 as a Mediator and Therapeutic Target in  
448 Alzheimer's Disease-related Pathogenesis. *Aging Dis* **11**, 705-724 (2020).
- 449 17. A. J. Park *et al.*, Learning induces the translin/trax RNase complex to express activin  
450 receptors for persistent memory. *Elife* **6**, (2017).
- 451 18. L. Meunier, Y. K. Usherwood, K. T. Chung, L. M. Hendershot, A subset of chaperones  
452 and folding enzymes form multiprotein complexes in endoplasmic reticulum to bind  
453 nascent proteins. *Mol Biol Cell* **13**, 4456-4469 (2002).
- 454 19. X. Liu *et al.*, Genome-wide analysis identifies NR4A1 as a key mediator of T cell  
455 dysfunction. *Nature* **567**, 525-529 (2019).



*ER chaperones and long-term memory*

- 456 20. X. M. Zhang *et al.*, Activity-induced synaptic delivery of the GluN2A-containing NMDA  
457 receptor is dependent on endoplasmic reticulum chaperone Bip and involved in fear  
458 memory. *Cell Res* **25**, 818-836 (2015).
- 459 21. J. Wang, J. Lee, D. Liem, P. Ping, HSPA5 Gene encoding Hsp70 chaperone BiP in the  
460 endoplasmic reticulum. *Gene* **618**, 14-23 (2017).
- 461 22. F. U. Hartl, A. Bracher, M. Hayer-Hartl, Molecular chaperones in protein folding and  
462 proteostasis. *Nature* **475**, 324-332 (2011).
- 463 23. L. Cortez, V. Sim, The therapeutic potential of chemical chaperones in protein folding  
464 diseases. *Prion* **8**, (2014).
- 465 24. D. H. Perlmutter, Chemical chaperones: a pharmacological strategy for disorders of  
466 protein folding and trafficking. *Pediatr Res* **52**, 832-836 (2002).
- 467 25. R. C. Rubenstein, M. E. Egan, P. L. Zeitlin, In vitro pharmacologic restoration of CFTR-  
468 mediated chloride transport with sodium 4-phenylbutyrate in cystic fibrosis epithelial cells  
469 containing delta F508-CFTR. *J Clin Invest* **100**, 2457-2465 (1997).
- 470 26. J. A. Burrows, L. K. Willis, D. H. Perlmutter, Chemical chaperones mediate increased  
471 secretion of mutant alpha 1-antitrypsin (alpha 1-AT) Z: A potential pharmacological  
472 strategy for prevention of liver injury and emphysema in alpha 1-AT deficiency. *Proc Natl*  
473 *Acad Sci U S A* **97**, 1796-1801 (2000).
- 474 27. E. Andersen *et al.*, The effect of the chemical chaperone 4-phenylbutyrate on secretion  
475 and activity of the p.Q160R missense variant of coagulation factor FVII. *Cell Biosci* **9**, 69  
476 (2019).
- 477 28. M. Cuadrado-Tejedor, A. L. Ricobaraza, R. Torrijo, R. Franco, A. Garcia-Osta,  
478 Phenylbutyrate is a multifaceted drug that exerts neuroprotective effects and reverses  
479 the Alzheimer s disease-like phenotype of a commonly used mouse model. *Curr Pharm*  
480 *Des* **19**, 5076-5084 (2013).
- 481 29. A. Ricobaraza, M. Cuadrado-Tejedor, S. Marco, I. Perez-Otano, A. Garcia-Osta,  
482 Phenylbutyrate rescues dendritic spine loss associated with memory deficits in a mouse  
483 model of Alzheimer disease. *Hippocampus* **22**, 1040-1050 (2012).
- 484 30. A. Ricobaraza *et al.*, Phenylbutyrate ameliorates cognitive deficit and reduces tau  
485 pathology in an Alzheimer's disease mouse model. *Neuropsychopharmacology* **34**,  
486 1721-1732 (2009).
- 487 31. J. C. Wiley, C. Pettan-Brewer, W. C. Ladiges, Phenylbutyric acid reduces amyloid  
488 plaques and rescues cognitive behavior in AD transgenic mice. *Aging Cell* **10**, 418-428  
489 (2011).
- 490 32. S. Mimori *et al.*, 4-Phenylbutyric acid protects against neuronal cell death by primarily  
491 acting as a chemical chaperone rather than histone deacetylase inhibitor. *Bioorg Med*  
492 *Chem Lett* **23**, 6015-6018 (2013).
- 493 33. M. Moon *et al.*, Nurr1 (NR4A2) regulates Alzheimer's disease-related pathogenesis and  
494 cognitive function in the 5XFAD mouse model. *Aging Cell* **18**, e12866 (2019).
- 495 34. J. A. Miller *et al.*, Neuropathological and transcriptomic characteristics of the aged brain.  
496 *Elife* **6**, (2017).
- 497 35. K. Santacruz *et al.*, Tau suppression in a neurodegenerative mouse model improves  
498 memory function. *Science* **309**, 476-481 (2005).

- 499 36. M. Ramsden *et al.*, Age-dependent neurofibrillary tangle formation, neuron loss, and  
500 memory impairment in a mouse model of human tauopathy (P301L). *J Neurosci* **25**,  
501 10637-10647 (2005).
- 502 37. M. Yue, A. Hanna, J. Wilson, H. Roder, C. Janus, Sex difference in pathology and  
503 memory decline in rTg4510 mouse model of tauopathy. *Neurobiol Aging* **32**, 590-603  
504 (2011).
- 505 38. C. Cook *et al.*, Severe amygdala dysfunction in a MAPT transgenic mouse model of  
506 frontotemporal dementia. *Neurobiol Aging* **35**, 1769-1777 (2014).
- 507 39. J. Gamache *et al.*, Factors other than hTau overexpression that contribute to tauopathy-  
508 like phenotype in rTg4510 mice. *Nat Commun* **10**, 2479 (2019).
- 509 40. Y. Chen *et al.*, Activity-induced Nr4a1 regulates spine density and distribution pattern of  
510 excitatory synapses in pyramidal neurons. *Neuron* **83**, 431-443 (2014).
- 511 41. B. Frost, M. Hemberg, J. Lewis, M. B. Feany, Tau promotes neurodegeneration through  
512 global chromatin relaxation. *Nat Neurosci* **17**, 357-366 (2014).
- 513 42. M. Montalbano *et al.*, RNA-binding proteins Musashi and tau soluble aggregates initiate  
514 nuclear dysfunction. *Nat Commun* **11**, 4305 (2020).
- 515 43. E. Schueller *et al.*, Dysregulation of histone acetylation pathways in hippocampus and  
516 frontal cortex of Alzheimer's disease patients. *Eur Neuropsychopharmacol*, (2020).
- 517 44. A. Schneider *et al.*, Acetyltransferases (HATs) as targets for neurological therapeutics.  
518 *Neurotherapeutics* **10**, 568-588 (2013).
- 519 45. S. Chatterjee *et al.*, A novel activator of CBP/p300 acetyltransferases promotes  
520 neurogenesis and extends memory duration in adult mice. *J Neurosci* **33**, 10698-10712  
521 (2013).
- 522 46. E. Benito *et al.*, HDAC inhibitor-dependent transcriptome and memory reinstatement in  
523 cognitive decline models. *J Clin Invest* **125**, 3572-3584 (2015).
- 524 47. K. J. Janczura *et al.*, Inhibition of HDAC3 reverses Alzheimer's disease-related  
525 pathologies in vitro and in the 3xTg-AD mouse model. *Proc Natl Acad Sci U S A* **115**,  
526 E11148-E11157 (2018).
- 527 48. J. Graff *et al.*, An epigenetic blockade of cognitive functions in the neurodegenerating  
528 brain. *Nature* **483**, 222-226 (2012).

529

## 530 **Acknowledgements**

531 We thank the Iowa Institute of Human Genetics (IIHG) core for RNA seq library preparation and  
532 sequencing. We thank the Neural Circuits and Behavior Core in the Iowa Neuroscience Institute  
533 for use of their facilities. We thank Dr. Ron Merrill and Dr. Stefan Strack for their help with  
534 optimization of cell culture experiments and Dr. Lisa Lyons, Dr. Thomas Nickl-Jockschat, Dr.  
535 Joshua Weiner and Dr. Kevin Campbell for comments on the manuscript. We also thank Cindy  
536 Cosme, Samuel Dahlke, and Saaman Ghodsi for technical assistance.

*ER chaperones and long-term memory*

537 **Funding:** This work was supported by grants from the National Institute of Health R01 MH  
538 087463 to T.A., The National Institute of Health K99 AG 068306 and the Nellie Ball Trust to  
539 S.C., The Gary & LaDonna Wicklund Research Fund for Cognitive Memory Disorders to T.A.  
540 and The University of Iowa Hawkeye Intellectual and Developmental Disabilities Research  
541 Center (HAWK-IDDRC) P50 HD103556 to T.A. T.A. is also supported by the Roy J. Carver  
542 Charitable Trust.

543 **Author contributions:** S.C. and T.A. conceived the study. S.C. and T.A. designed the  
544 experiments with input from J.M. and K.P.G. S.C. performed the behavioral tasks, stereotactic  
545 surgeries and molecular biology experiments. E.B. and Y.V. performed the bioinformatic  
546 analysis. U.M., J.D.L., A.L.Y. and E.N.W. performed biochemical experiments and analyzed  
547 behavioral results. U.M. performed cell culture experiments. M.S.S. performed  
548 electrophysiological experiments. S.C. and T.A. interpreted the results and wrote the article.

549 **Competing interests:** The authors declare no competing interests.

550 **Data and materials availability:** The data that support the findings of this study are available  
551 within the article, its Extended Data files and Supplemental Files. All the uncropped western  
552 blots and raw data are also provided. The RNA seq data have been deposited in the NCBI  
553 Gene Expression Omnibus and are accessible through GEO Series accession number  
554 GSE167566. The code for analyses and figures related to RNA-seq data can be accessed  
555 through GitHub ([https://github.com/ethanbahl/chatterjee2021\\_nr4a](https://github.com/ethanbahl/chatterjee2021_nr4a)).

556 **Supplementary Materials**

557 Materials and Methods

558 Fig. S1-S13

559 References

560

561

562

**Figure 1**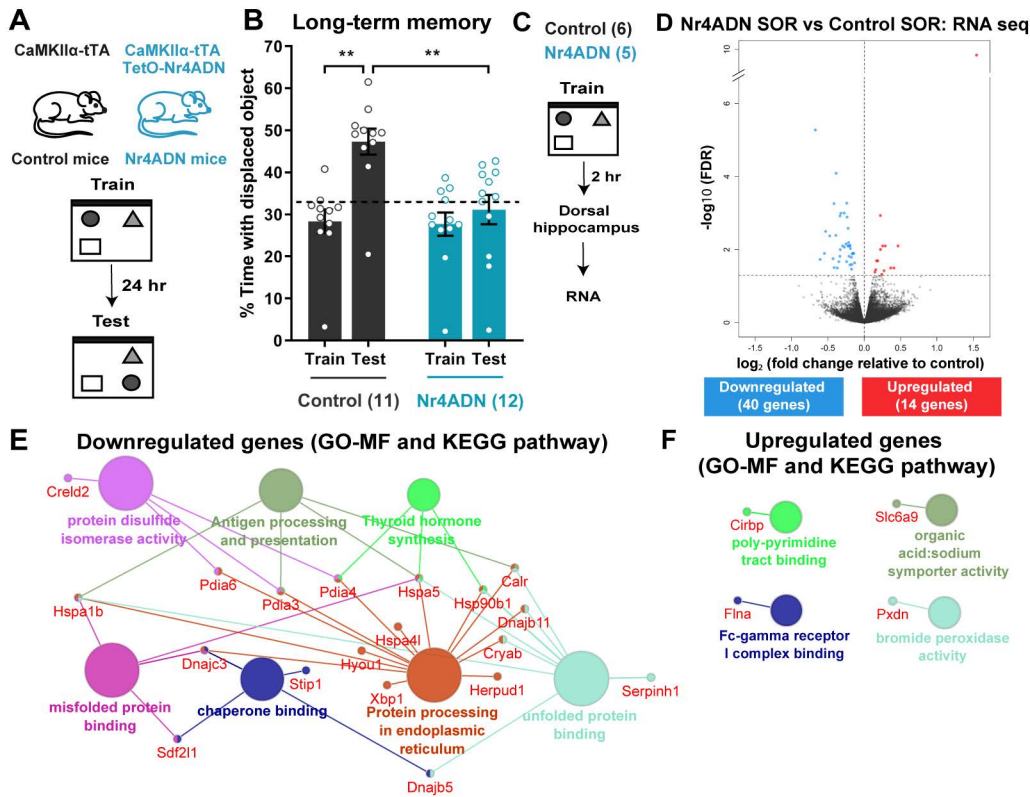

**Figure 2**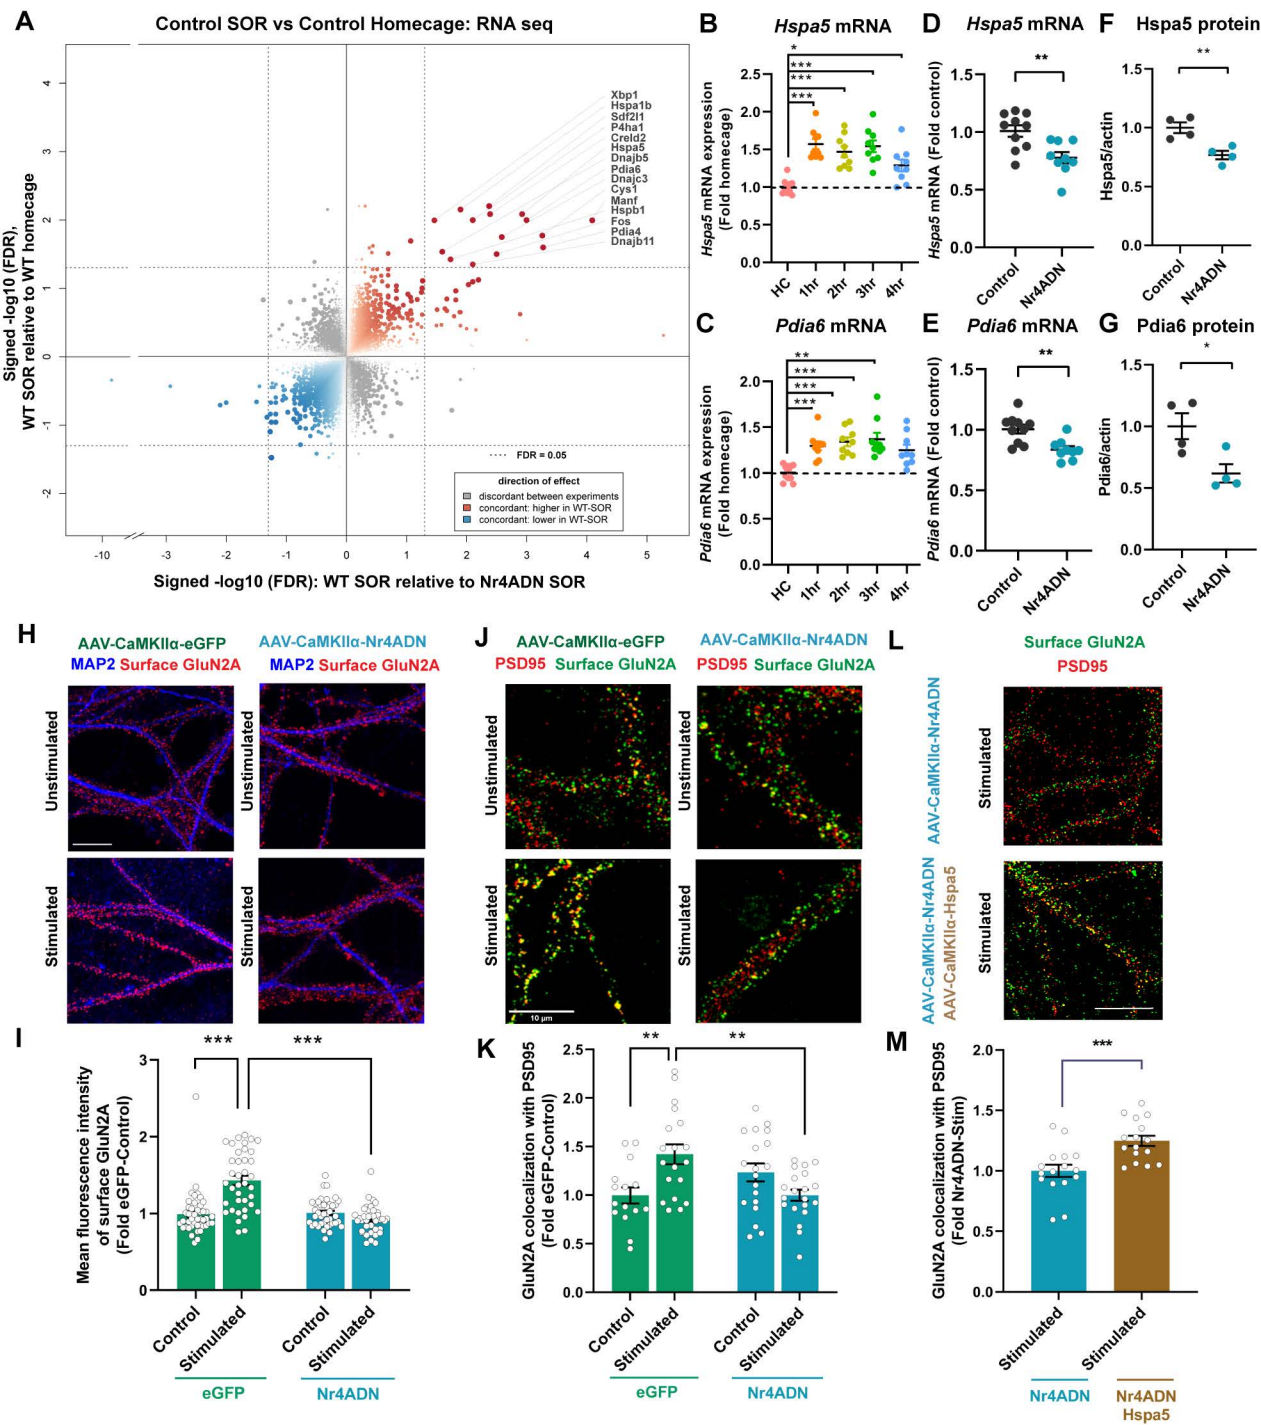



**Figure 3**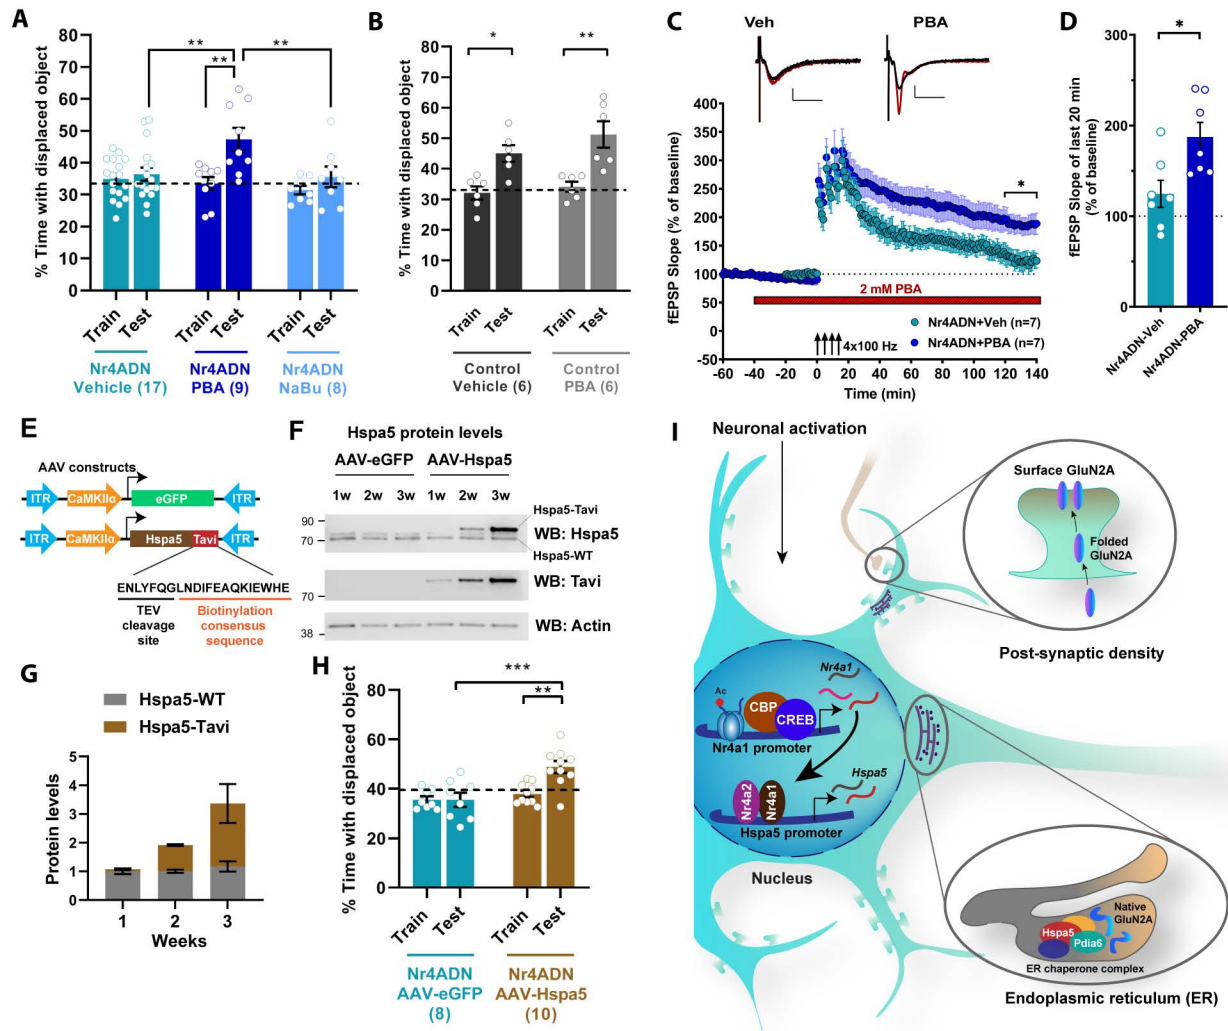



**Figure 4**

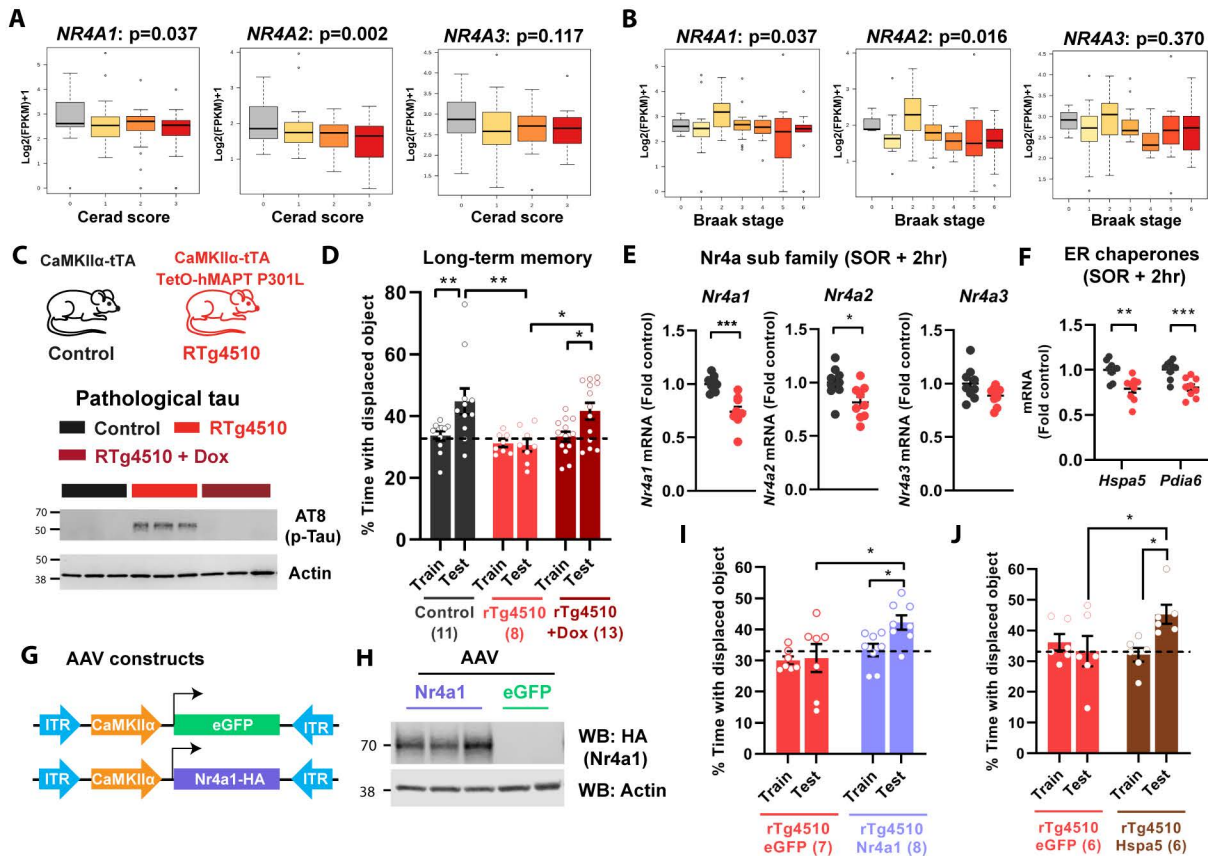

Supplementary materials for  
**Endoplasmic Reticulum Chaperone Genes Encode Effectors of Long-Term  
Memory**

Snehajyoti Chatterjee<sup>1,2</sup>, Ethan Bahl<sup>3</sup>, Utsav Mukherjee<sup>1,2,4</sup>, Emily N. Walsh<sup>1,2,4</sup>, Mahesh Shivarama Shetty<sup>1,2</sup>, Amy L. Yan<sup>1,2</sup>, Yann Vanrobaeys<sup>1,2,3</sup>, Joseph D. Lederman<sup>2</sup>, K. Peter Giese<sup>5</sup>, Jacob Michaelson<sup>6,7,8,9</sup> and Ted Abel<sup>1,2\*</sup>

\* Corresponding author: [ted-abel@uiowa.edu](mailto:ted-abel@uiowa.edu)

**This file includes**

Materials and Methods

Fig. S1-S13

References

## Materials and Methods

**Data reporting:** No statistical methods were used to predetermine sample size.

**Mouse lines:** Nr4ADN mice – Adult Nr4ADN mice were 2-4 months old at the time of behavioral or biochemical experiments. They were maintained on a C57BL/6J background and harbor both the CaMKII $\alpha$ -tTA and Tet-O-Nr4ADN transgenes(1). Incorporation of the CaMKII $\alpha$ -tTA transgene into chromosome 12 causes a 508.12 Kb deletion that affects 5 genes: *Vipr2*, *Wdr60*, *D430020J02Rik*, *Ncapg2* and *Ptprn2*. To account for any effects of the deleted genes on memory or gene expression(2), age-matched CaMKII $\alpha$ -tTA expressing littermates were used as controls throughout the study. rTg4510 mice – These mice were 3-4 months old at the time of behavioral or biochemical experiments. They were maintained on a C57BL/6J background and harbor two transgenes: CaMKII $\alpha$  driven tTA, and TetO driven human tau P301L. Age-matched CaMKII $\alpha$ -driven tTA expressing littermates were used as controls. C57BL/6J mice – Adult male mice purchased from Jackson Laboratories were 2-4 months age during behavioral or biochemical experiments. All mice had free access to food and water; lights were maintained on 12 h: 12 h light/dark cycle. To suppress TetO driven expression of Nr4ADN or human tauP301L transgenes, Nr4ADN or rTg4510 mice were placed on a diet containing doxycycline (200 mg/kg, Bio-Serv) from weaning until behavioral experiments. All behavioral testing was performed during the light cycle between Zeitgeber time (ZT) 0-2. For all behavioral and biochemical experiments, mice were randomly assigned to groups, housed individually for seven days prior to experiments, and handled for 2 min per day for 5 days. All experiments were conducted according to US National Institutes of Health guidelines for animal care and use and were approved by the Institutional Animal Care and Use Committee of the University of Iowa, Iowa.

**Drugs:** Sodium phenyl butyrate (PBA, Sigma) and Sodium butyrate (NaBu, Sigma) was dissolved in saline. For electrophysiology experiments, the dose of PBA was chosen based on the range of IC<sub>50</sub> values reported in the published literature(3). For behavioral experiments, mice were injected with PBA or NaBu *i.p.* at a dose of 200 mg/kg, immediately after SOR training. Control mice were injected with vehicle (0.9% sterile saline).

**Adeno-associated virus (AAV) constructs:** AAV<sub>2.9</sub>-CaMKII $\alpha$ -eGFP, AAV<sub>2.9</sub>-CaMKII $\alpha$ -Nr4A1-HA, AAV<sub>2.9</sub>-CaMKII $\alpha$ -Hspa5-Tavi, AAV<sub>2.2</sub>-CaMKII $\alpha$ -Nr4ADN, and AAV<sub>2.2</sub>-CaMKII $\alpha$ -eGFP were purchased from VectorBuilder (VectorBuilder Inc).

**Stereotactic surgeries:** Mice were anaesthetized using isoflurane and kept on a warm heated pad throughout the stereotactic surgery procedure. Meloxicam was injected as analgesics(4). Viral infusion was performed using a 33G beveled needle (World Precision Instruments, WPI) attached to a 10  $\mu$ l Nanofil syringe controlled by a microsyringe pump (UMP3; WPI). The coordinates for dorsal hippocampus were: anteroposterior,  $-1.9$  mm, mediolateral,  $\pm 1.5$  mm, and  $1.5$  mm below bregma. The needle was lowered to the site of injection over the course of 5 min and remained at the target for 1 min before injection was initiated ( $0.2\mu$ l per min). Each hippocampus was injected with approximately 1  $\mu$ l of the relevant constructs. After injection was completed, the needle remained at the site for one additional minute and then slowly removed over a 5 min period. A small amount of bone wax (Lukens) was then used to close the drill holes and the incision was closed with sutures.

**Spatial object recognition task:** All animals were housed individually for 1 wk before behavioral experiments were initiated. Age-matched littermates were used. Mice were handled for 2 min per day for 5 consecutive days prior to the behavioral task. All spatial memory tasks were conducted between ZT0 to ZT2. Briefly, mice were habituated in the open field arena for 6 min during the habituation session, followed by three 6-min training sessions in the same open field containing three different glass objects. The intertrial interval was 3 min, during which the mice were returned to their homecage and the objects and arena were cleaned with 70% ethanol. An internal spatial cue (vertical black lines printed on a white paper 18 cm X 12 cm in size) was attached to one wall of the open field to allow the mice to locate each object relative to the spatial cue during free exploration of the arena. After either 1 hr or 24 hr following the training sessions, mice were brought back to the open field in which the location of one of the objects was displaced to a novel spatial location. Time spent exploring the displaced object (DO) and the non-displaced objects (NDO) during the 6-min test session was recorded. The exploration was hand-scored by an experimenter blinded to the genotype or treatment. Animals were assigned to the arenas randomly, without use of any randomization software. An object was scored as "explored" if it was sniffed or touched, or the face was in close proximity (within 1 cm) to the object, as described previously(5).

**Electrophysiology:** Nr4ADN male mice 2-3 months age were used. Mice were euthanized by cervical dislocation and the brain was quickly dissected into cold artificial cerebrospinal fluid (aCSF), which was continuously bubbled with carbogen (95% O<sub>2</sub>, 5% CO<sub>2</sub>). The isolation of hippocampi and preparation of acute hippocampal slices were performed as described(6). Transverse acute hippocampal slices of 400- $\mu$ m thickness were prepared from both hippocampi

using a manual McIlwain slicer (Stoelting). The slices were quickly transferred onto a net insert in an interface recording chamber (Fine Science Tools, Foster City, CA) and left to equilibrate to a humidified carbogen atmosphere at 28°C for at least 2-3 hr before recordings were initiated. The slices were perfused at 1 mL/min with oxygenated aCSF throughout the experiments. The aCSF used for both the dissection and recordings was composed of 124 mM NaCl, 4.4 mM KCl, 1 mM NaH<sub>2</sub>PO<sub>4</sub>, 2.5 mM CaCl<sub>2</sub>·2H<sub>2</sub>O, 1.3 mM MgSO<sub>4</sub>·7H<sub>2</sub>O, 26.2 mM NaHCO<sub>3</sub> and 10 mM D-glucose; pH ~7.4 when equilibrated with carbogen. Field excitatory post-synaptic potentials (fEPSPs) were recorded in the CA1 stratum radiatum by stimulating Schaffer collaterals with a monopolar, lacquer-coated stainless-steel electrode (~5 MΩ resistance, A-M Systems, # 571000) and recording with an aCSF-filled glass microelectrode (2–5 MΩ resistance). In all experiments, test stimulation was a biphasic, constant-current pulse (100 μs duration) delivered every min at a stimulation intensity that evoked ~40% of the maximal fEPSP amplitude, as determined by an input-output curve (stimulation intensity vs fEPSP amplitude). Also, a stable baseline was recorded for at least 20 min before LTP was induced or drug was applied. LTP was induced by a spaced 4-train stimulation protocol consisting of four 100 Hz, 1-sec trains delivered at 5-min intervals, at the test stimulus intensity. For each experiment, PBA solution (2 mM) was prepared fresh by dissolving in aCSF, and it was applied to the bath and protected from light. The solution was recirculated after 30 min of initial application. In the electrophysiological data presented, 'n' represents the number of slices. Data were acquired using Clampex 10 and Axon Digidata 1440 digitizer (Molecular Devices, Union City, CA) at 20 kHz and were low-pass filtered at 2 kHz with a four-pole Bessel filter. Data analysis was performed using the Clampfit 10 software (Molecular Devices, Union City, CA). Data were plotted and statistical analyses were performed using the GraphPad Prism 8 software. For each slice, the fEPSP slopes were normalized against the average slope over the 20-min baseline (pre-drug baseline in the PBA-treated slices). Data are presented as mean ± SEM. LTP persistence was assessed by comparing the final 20-min recordings for the vehicle and treatment groups using a two-way repeated measures ANOVA. The mean fEPSP slope of the final 20-min recordings for each group was compared using two-tailed, unpaired t-test. Statistical significance was set at p<0.05.

***Isolation of whole-cell extracts and synaptosomal fractions:*** For whole-cell lysate preparation, flash frozen dorsal hippocampal tissue was homogenized mechanically in 300 μl of ice-cold RIPA buffer (Sigma) supplemented with 0.2% Triton X-100 (Sigma), and Protease and Phosphatase Inhibitor Cocktail (1:100, Thermo Scientific). The lysate was kept on ice for 30 mins, following which they were centrifuged at 10,000 x g for 15 min at 4°C. The pellet was discarded,

and the supernatant (whole cell lysate) was collected for Western blot analysis. For synaptosomal extraction, Hippocampal tissue was mechanically homogenized in Syn-PER Reagent (Thermo Fisher Scientific) containing Halt Protease and Phosphatase Inhibitor Cocktail (1:100, Thermo Scientific). The homogenate was centrifuged at 1200 x g for 10 min at 4°C, after which the pellet (nuclear fraction) was discarded and the supernatant was centrifuged again at 15,000 x g for 25 min at 4°C. This pellet (synaptosomal fraction) was resuspended in RIPA buffer (Sigma) containing Halt Protease and Phosphatase Inhibitor Cocktail (1:100) and 0.2% Triton X-100 (Sigma).

**Western blot analysis:** Protein extracts were transferred to polyvinylidene difluoride membranes as previously described(7). Membranes were blocked with Odyssey® Blocking Buffer in TBS (LI-COR) and incubated overnight at 4°C with the following primary antibodies: Hspa5 (1:2000, Proteintech 11587-1-AP), Pdia6 (1:2000, Abcam ab11432), Biotin Ligase Epitope Tag (for Tavi-tag detection, 1:1000, Abcam ab106159), PSD95 (1:5000, ThermoFisher Scientific, 6G6-1C9), HA (1:2000, Millipore Sigma), phospho-tau AT8 (1:5000, Biolegend, 806503), Actin (1:10,000, ThermoFisher Scientific), ATF4 (1:500, Thermo Fisher Scientific, PA5-27576), ATF6 (1:500, Thermo Fisher Scientific, PA5-114886), phospho-IRE1alpha (1:500, Thermo Fisher Scientific, PA5-85738). Membranes were washed and incubated with appropriate IRDye IgG secondary antibodies, including anti-rabbit IRDye 800LT (1:5,000, LI-COR) and anti-mouse IRDye 680CW (LI-COR). Images were acquired using the Odyssey Infrared Imaging System (LI-COR). Quantification of western blot bands was performed using Image Studio Lite ver5.2 (LI-COR).

**RNA extraction, cDNA synthesis and quantitative real-time reverse transcription (RT)-PCR:** Dorsal hippocampi were dissected and immediately stored at -80°C in RNAlater solution (Ambion) for later isolation of total RNA. For RNA extraction, Qiazol (Qiagen) was added to the hippocampal tissues and they were homogenized using stainless steel beads (Qiagen). Chloroform was then added to the homogenates and the samples were centrifuged at 12,000 x g at RT for 15 min. RNA was precipitated from the aqueous phase using ethanol and then cleaned using the RNeasy kit (Qiagen). RNA was eluted in nuclease-free water and treated with DNase (Qiagen) at RT for 25 min. The cleaned RNA was precipitated in ethanol, sodium acetate (pH 5.2) and glycogen overnight at -20°C. RNA samples were centrifuged at top speed at RT for 20 min. The precipitates were further washed with 70% ethanol and centrifuged at top speed for 5 min. The RNA precipitates were dried and resuspended in nuclease free water, and concentrations were estimated using a Nanodrop (Thermo Fisher Scientific). cDNAs were prepared from 1 µg RNA using the SuperScript™ IV First-Strand Synthesis System (Ambion). Real-time RT-PCR reactions



were performed in a 384-well optical reaction plate with optical adhesive covers (Life Technologies). Each reaction was composed of 2.25 $\mu$ l cDNA (2 ng/ $\mu$ l), 2.5 $\mu$ l Fast SYBR™ Green Master Mix (Thermo Fisher Scientific), and 0.25 $\mu$ l of primer mix (IDT). A minimum of three technical replicates per reaction was performed on the QuantStudio 7 Flex Real-Time PCR system (Applied Biosystems, Life Technologies). Data was normalized to housekeeping genes (*Tubulin*, *Pgk1* and *B2m*) and  $2^{(-\Delta\Delta Ct)}$  method was used for gene expression analysis.

**RNA library preparation, sequencing and analysis:** RNA libraries were prepared at the Iowa Institute of Human Genetics (IIHG), Genomics Division, using the Illumina TruSeq Stranded Total RNA with Ribo-Zero gold sample preparation kit (Illumina, Inc., San Diego, CA). KAPA Illumina Library Quantification Kit (KAPA Biosystems, Wilmington, MA) was used to measure library concentrations. Pooled libraries were sequenced on Illumina HiSeq4000 sequencers with 150-bp Paired-End chemistry (Illumina) at the IIHG core. RNA-sequencing data was processed with the bcbio-nextgen pipeline (<https://github.com/bcbio/bcbio-nextgen>, version 1.1.4). The pipeline uses STAR(8) to align reads to the mm10 genome build (GENCODE release M10, Ensembl 89 annotation) and quantifies expression at the gene level with featureCounts(9). All further analyses were performed using R(10). For gene level count data, the R package EDASeq(11) was used to adjust for GC content effects (full quantile normalization) and account for sequencing depth (upper quartile normalization) (Extended Data Fig 10 and 12). Latent sources of variation in expression levels were assessed and accounted for using RUVSeq (RUVr mode using all features)(12) (Extended Data Fig 11 and 13). Appropriate choice of the RUVSeq parameter  $k$  was guided through inspection of  $P$  value distributions, relative log expression (RLE) plots, and principal component analysis (PCA) plots. Specifically, the smallest value  $k$  was chosen where the  $P$  value distribution showed an expected peak below 0.05, RLE plots were evenly distributed and zero-centered, and PCA plots demonstrated replicate sample clustering in the first three principal components(13). Differential expression analysis was conducted using the edgeR quasi-likelihood pipeline(14-16). Codes to reproduce the RNA-sequencing analysis are available at [https://github.com/ethanbahl/chatterjee2021\\_nr4a](https://github.com/ethanbahl/chatterjee2021_nr4a).

**GO and pathway enrichment analyses of DEGs:** The ClueGO(17) and CluePedia plug-ins of the Cytoscape 3.7.5 software(18) were used in “Functional analysis” mode, using the default parameters for analyzing gene ontology, molecular function and KEGG pathways in networks for DEGs. The names of significant DEG were pasted into the “Load Marker List” of ClueGO, and the organism “Mus Musculus [10090]” was selected.

**Construction of protein-protein interaction (PPI) networks:** The protein-protein interactive network was constructed using STRING(19) (version 11.0), which uses the STRING database (<http://string-db.org/>)(20). The PPI network was constructed to identify the interactions between proteins encoded by down-regulated DEGs based on experimental data. The DEG names were pasted into “STRING protein query”. Active interaction sources, including text-mining, experiments, databases, co-expression, neighborhood, gene fusion and co-occurrence were applied and highest interaction score confidence (0.900) was selected to construct the PPI networks. Full network was constructed, where the edges indicate both functional and physical protein associations.

**ChIP-seq analysis:** Using the SRA toolkit fastq-dump, raw ChIP-seq data from Liu et al(21) (GEO accession code GSE96969) was downloaded, including Nr4a1-HA (SRR6788331), IgG-control (SRR6788333), and input DNA (SRR6788332). The raw reads were trimmed using Trimmomatic version 0.36 with the parameters ILLUMINACLIP:2:30:15 LEADING:30 TRAILING:30 MINLEN:23, and quality inspection was conducted using FastQC version 0.11.5. The trimmed reads from all data sets were aligned using BWA version 0.7.15 with the algorithm mem and default parameters. Signal density files in BedGraph format were generated using BEDTools genomecov version 2.26.0 with default parameters and then converted in uniform 10 nucleotide-bin WIG files for further normalization steps. Peak calling was done using MACS2 version 2.1.2 with a q-value cutoff of 0.01 and default parameters. Each signal density file corresponding to a data set was scaled such that the total sum of the signal over the mouse mm10 genome was equivalent to 1M reads of 100 nucleotides. The signal of the input data set was then subtracted from its corresponding IP data set to generate the “sciWT-ctrl” files. The normalized WIG files were then encoded in bigWig format using the Kent utilities and visualized using the Integrative Genomics Viewer with the mouse mm10 reference genome.

**Primary neuronal cultures and AAV-transduction:** Hippocampi from mice (C57BL/6J) were used to generate primary neuronal cultures as previously described(22). Briefly, hippocampi from postnatal P0/P1 pups were dissected, trypsinized (0.25%), and triturated using a fire-polished glass Pasteur pipette to prepare a single-cell suspension. Cells were then plated on poly-L-lysine (1mg/ml) coated 4-well glass-bottom dishes (Cellvis) at optimal density (150-200 cells/mm<sup>2</sup>) and maintained in Neurobasal medium (Gibco) containing B27 Supplement (Gibco), in an incubator with 5% CO<sub>2</sub> and at 37°C. At Days *in vitro* (DIV) 16-17, neurons were transduced with AAV<sub>2.2</sub>-CaMKII $\alpha$ -Nr4ADN, AAV<sub>2.9</sub>-CamKII $\alpha$ -Hspa5-Tavi, and and AAV<sub>2.2</sub>-CaMKII $\alpha$ -eGFP (titer of concentrated viral stock was 1-2 × 10<sup>13</sup>TU/ml) in a 1:1000 dilution of Neurobasal Medium

containing B27 Supplement. At 8-10 hrs following transduction, half of the existing medium was replenished with fresh Neurobasal medium containing B27 Supplement. Cultures were typically maintained until DIV 23-25 before experiments commenced.

**KCl stimulation and surface labelling of GluN2A:** At DIV 23-25, neurons were incubated in low KCl-HBS (290 mOSm) (110 mM NaCl, 5.4 mM KCl, 1.8 mM CaCl<sub>2</sub>, 0.8 mM MgCl<sub>2</sub>, 10 mM D-glucose, 10 mM HEPES-NaOH pH 7.4) for 60 mins. Thereafter, neurons were stimulated for another 60 mins with high KCl-HBS (same as low KCl-HBS, except for 55 mM NaCl and 60 mM KCl). The high KCl-HBS was washed off, and live neurons were then immunolabelled with N-terminal NMDAR2A antibody (1:25, Thermo Fisher) in low KCl-HBS for 30 mins to exclusively stain the surface GluN2A receptors. Following the antibody incubation, the cells were washed twice with phosphate buffered saline containing Mg<sup>2+</sup> and Ca<sup>2+</sup> (PBS-MC; 137mM NaCl, 2.7 mM KCl, 10 mM Na<sub>2</sub>HPO<sub>4</sub>, 2mM KH<sub>2</sub>PO<sub>4</sub>, 1 mM MgCl<sub>2</sub> and 0.1 mM CaCl<sub>2</sub>). Cells were then fixed in PBS-MC containing 2% paraformaldehyde and 2% sucrose for 15 minutes at 37°C, washed thrice in PBS-MC at room temperature and blocked with PBS-MC containing 2% BSA for 60 minutes at room temperature. Cells were incubated with Alexa-647 conjugated goat-anti-rabbit secondary antibody (1:200, Invitrogen) at room temperature for 90 minutes in blocking solution. Neurons were then permeabilized with PBS-MC containing 0.1% Triton-X-100 at room temperature for 5 minutes, incubated with blocking solution for 60 minutes, and thereafter with MAP2 antibody (1:1000, Sigma) for 8-10 hours at 4°C. For PSD95 immunocytochemistry, permeabilized neurons were incubated with PSD95 antibody (1:4000, Enzo Life Sciences) for 8-10 hours at 4°C. Cells were washed thrice in PBS-MC and incubated with Alexa-546 conjugated goat-anti-mouse secondary antibody (1:200, Invitrogen) at room temperature for 60 minutes. Finally, cells were washed three times with PBS-MC at room temperature and preserved in PBS-MC for future imaging.

**Confocal imaging and image analysis:** Cultured neurons after completion of the experiments were imaged using Olympus FV3000 confocal microscope with a 100X NA = 1.45 oil immersion objective at 1024 × 1024-pixel resolution. High magnification images were captured using 3X optical zoom. All images (8 bit) were acquired with identical settings for laser power, detector gain and pinhole diameter for each experiment and between experiments. Images from the different channels were stacked and projected at maximum intensity using ImageJ (NIH). Mean Fluorescence Intensity (MFI) of surface GluN2A and the colocalization between surface GluN2A and PSD95 punctas was assessed using plugins in ImageJ.

**Analysis of human Alzheimer’s disease:** Using RNA-sequencing data from the “Aging, Dementia and TBI Study”(23) provided by the Allen Institute for Brain Science, we fit linear models between the RIN-corrected and  $\log_2$ -transformed hippocampal expression levels of NR4A family members and the individual’s Cerad score, a semiquantitative estimate of neuritic plaque density(23).

**Statistics:** Behavioral and biochemical data were analyzed using paired or unpaired two-tailed t-tests and either one-way or two-way ANOVAs (in some cases with repeated measures as the within subject variable). Sidak’s tests were used for post-hoc analyses where needed. Differences were considered statistically significant when  $p < 0.05$ . As indicated for each figure panel, all data are plotted in either bar graphs, in which symbols represent each data point, or in dot plots, where each symbol represents an individual data point. Graphs were plotted as mean  $\pm$  SEM.

Fig. S1

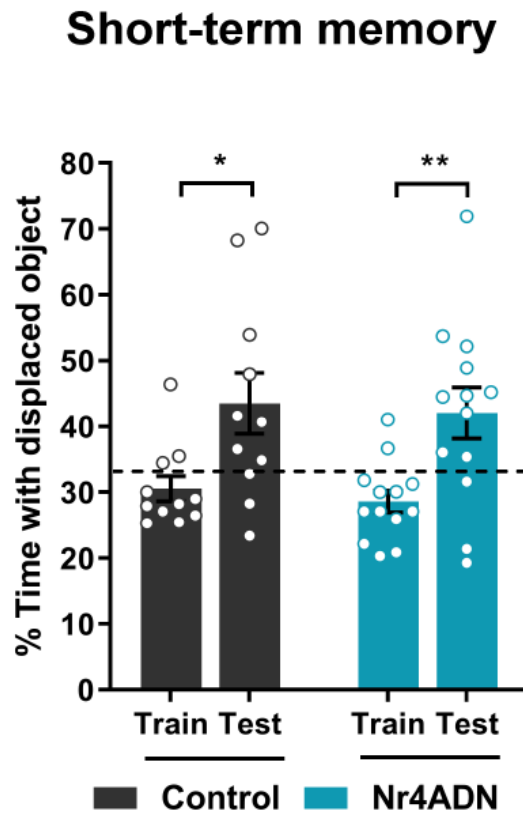

**Fig. S1. Nr4ADN mice show intact short-term memory.** Both Nr4ADN and control mice showed significant preference for DO during the 1h short-term memory test. Two-way ANOVA: Significant main effect of session ( $F_{(1, 22)} = 21.49$ ,  $p < 0.0001$ ), Sidak's multiple comparison tests: \* $p = 0.0107$  (control mice, train vs 24h test,  $n = 11$  (5F)) and \*\* $p = 0.0041$  (Nr4ADN mice, train Vs 24h test,  $n = 13$  (7F)).

**Fig. S2**

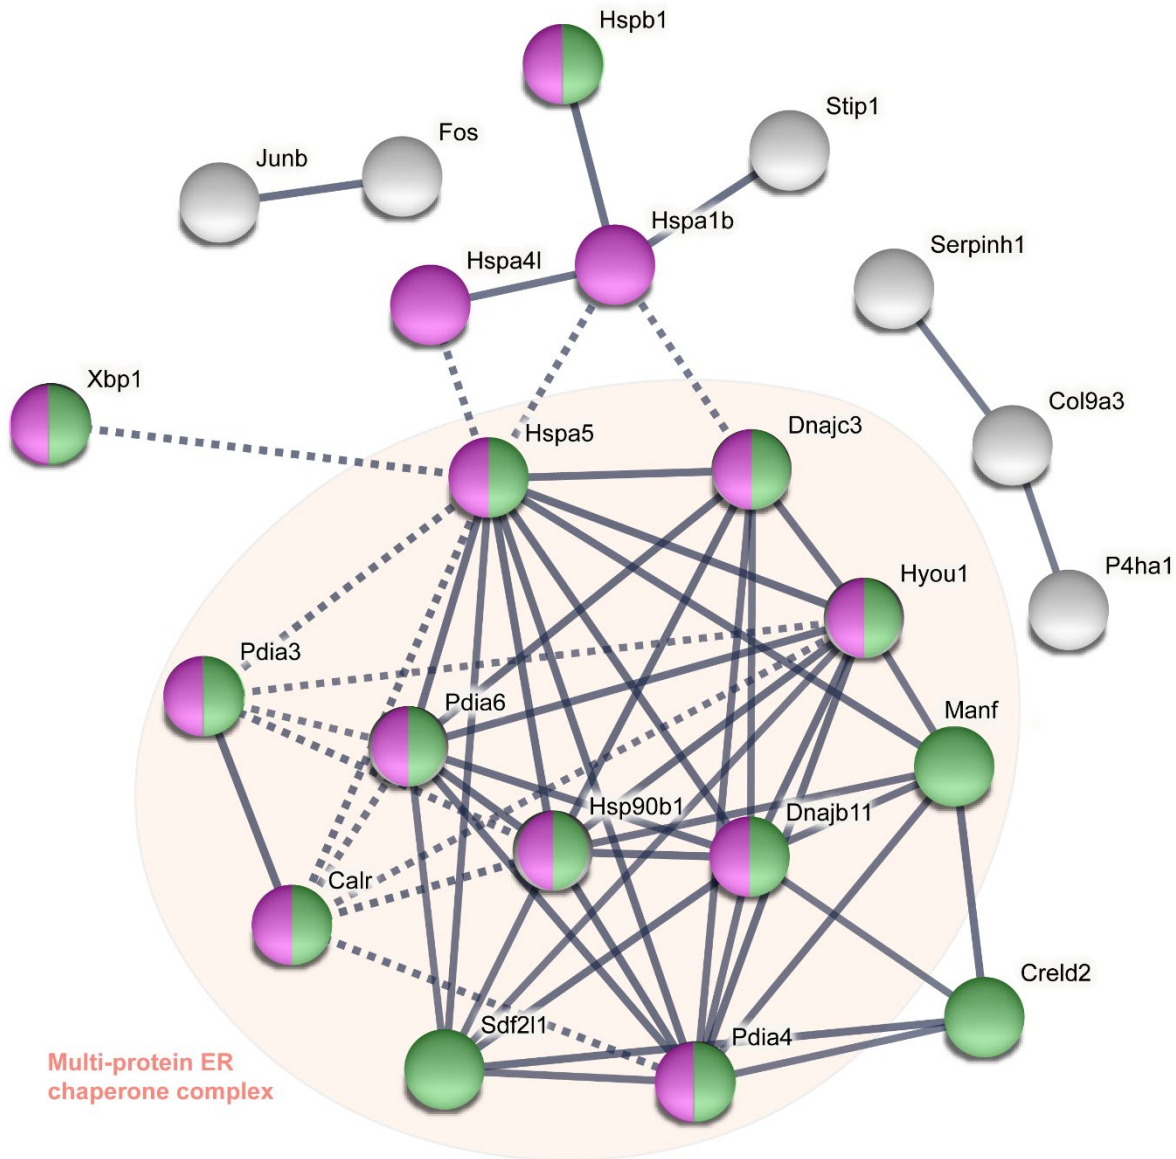

**Fig. S2. Nr4A transcription factors regulate the expression of genes encoding chaperone proteins that form a multiprotein ER chaperone complex.** Depiction of multi-protein ER chaperone complex identified by STRING (Search Tool for the Retrieval of Interacting Genes/Proteins) analysis. Functional protein association networks were inferred from downregulated genes in Nr4ADN mice after learning. This complex consists of Hspa5, Pdia6 and other ER chaperones, and enables the proper folding and trafficking of nascent proteins. Green: proteins associated with ER chaperone complex (local network cluster in STRING, FDR=1.00e-26), Purple: proteins associated with protein processing in ER (KEGG pathway, FDR=3.29e-18). Edges represent confidence of protein-protein associations. Proteins inside the red shape are part of multiprotein ER chaperone complex which facilitates folding of nascent proteins.



**Fig. S3**

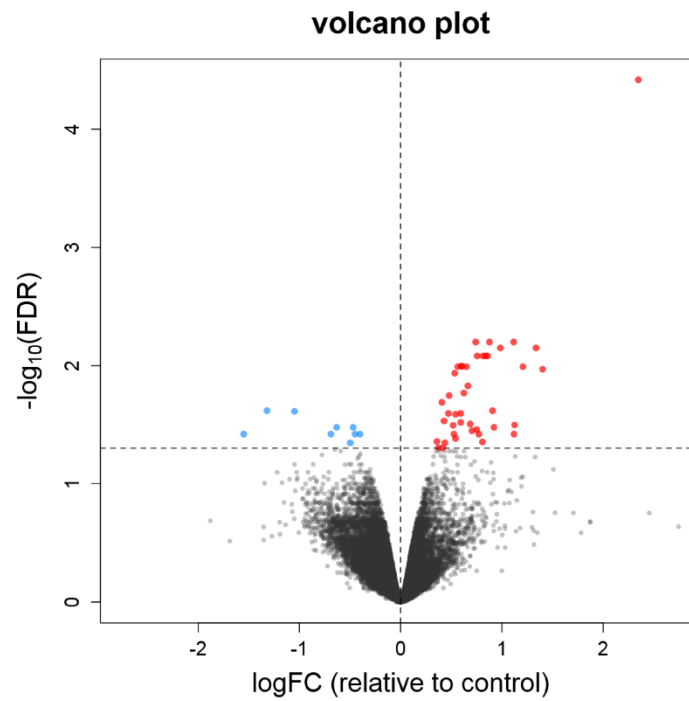

**Fig. S3. RNA-seq analysis for control mice.** Volcano plot comparing genes that are differentially expressed in the dorsal hippocampus between control mice (tTA<sup>+</sup> DN<sup>-</sup> n=2, tTA<sup>-</sup> DN<sup>-</sup> n=2) 2 hr after SOR training and homecage controls (tTA<sup>+</sup> DN<sup>-</sup> n=2, tTA<sup>-</sup> DN<sup>-</sup> n=2). SOR learning led to the upregulation of 42 genes and the downregulation of 9 genes.

**Fig. S4**

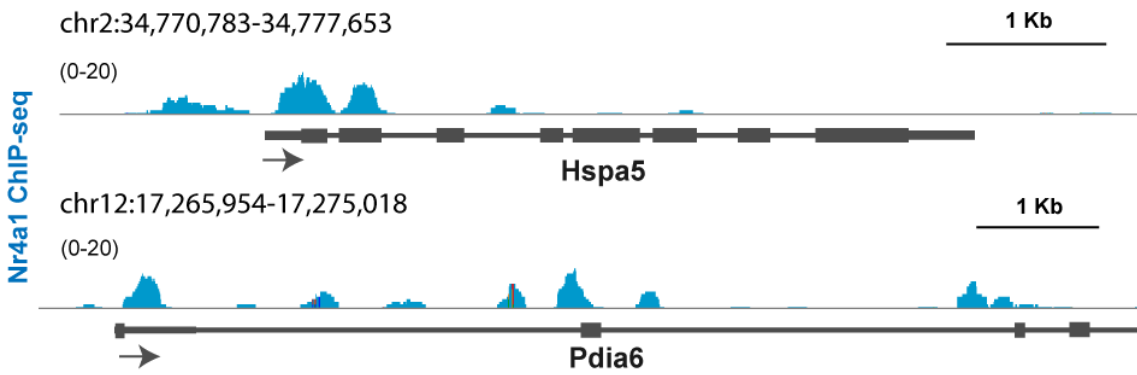

**Fig. S4. Nr4a1 is enriched on Hspa5 and Pdia6 promoter.** Genome browser track view of ChIP-seq data for Nr4a1 peak at the promoters of *Hspa5* and *Pdia6* (Liu, X., et al. 2019).

Fig. S5

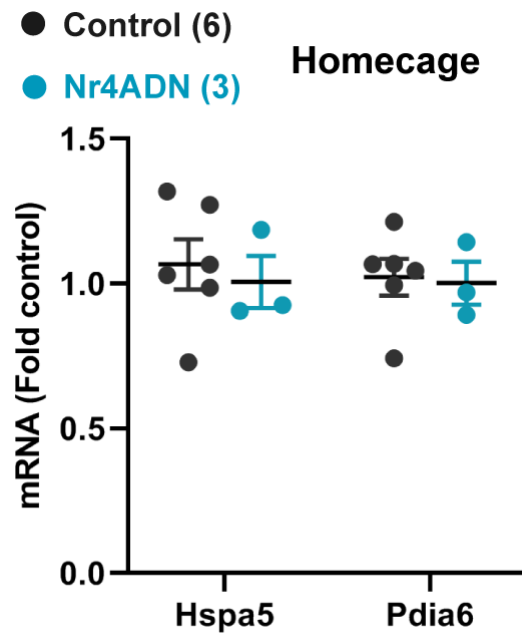

**Fig. S5. ER chaperones are not differentially expressed in homecage Nr4ADN mice.** Levels of mRNAs encoding *Hspa5* and *Pdia6* in 2 mo-old control and Nr4ADN in home cage. The dorsal hippocampus was isolated when the mice reached 2 mo of age and total RNA was extracted and analyzed by qPCR. Both the *Hspa5* and *Pdia6* mRNAs were expressed at similar levels in Nr4ADN and control mice. Unpaired t-test:  $t_{(7)}=0.4304$ ,  $p=0.6798$  (*Hspa5*) and  $t_{(7)}=0.1937$ ,  $p=0.8519$  (*Pdia6*).

Fig. S6

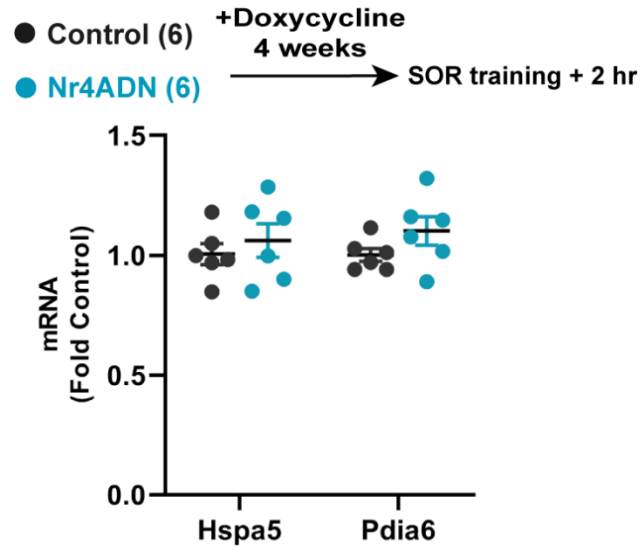

**Fig. S6. Blocking Nr4ADN transgene expression abolishes downregulation of ER chaperone genes.** Levels of mRNAs encoding Hspa5 and Pida6 at 2 mo of age, after SOR training. Mice were placed on a diet containing doxycycline from weaning until 2 mo of age, to suppress transgene expression in the Nr4ADN mice. The mice were then trained in SOR and the dorsal hippocampus was removed 2 hr after training was completed. Total RNA was isolated, and qPCR was performed. *Hspa5* and *Pdia6* mRNA levels were equivalent to those in control littermates fed the same diet. Unpaired t-test:  $t_{(10)}=0.6846$ ,  $p=0.3338$  (*Hspa5*),  $t_{(10)}=1.536$ ,  $p=0.1089$  (*Pdia6*).

Fig. S7

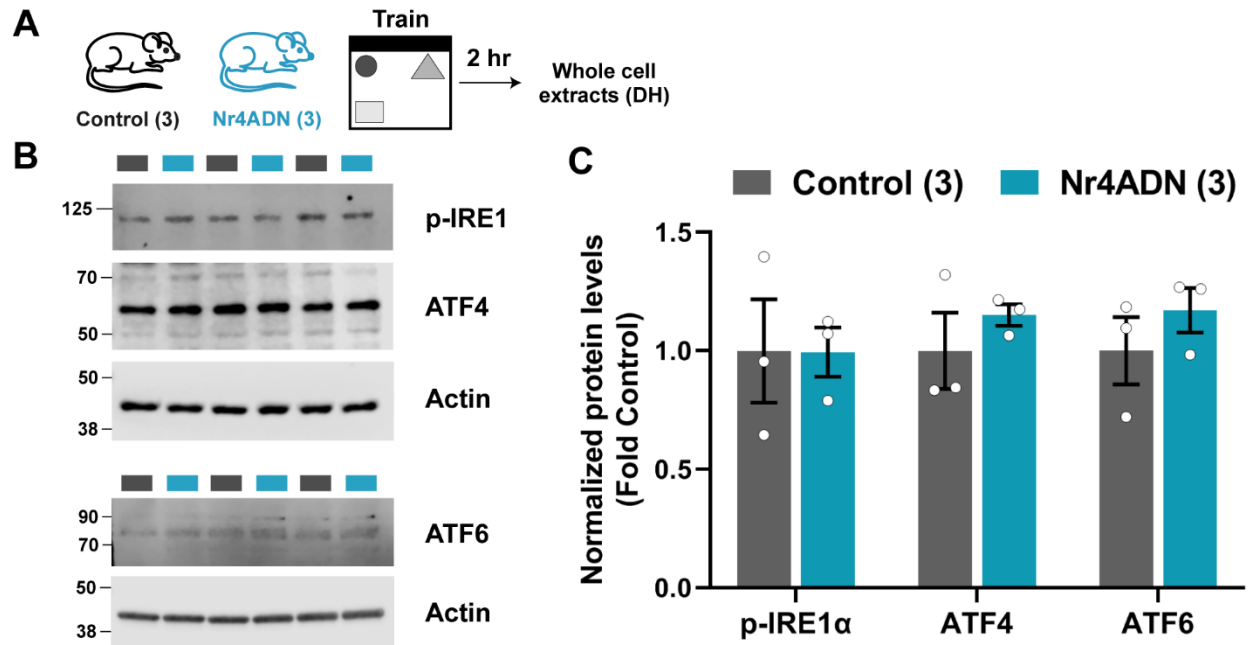

**Fig. S7. Nr4ADN mice do not show any evidence of elevated ER stress response following SOR learning. (A)** Nr4ADN and control mice were trained in SOR and 2 hr after training, the dorsal hippocampus was extracted for analyses of ER stress markers. **(B)** p-IRE1, ATF4 and ATF6 levels were measured using Western blot analysis from whole cell extracts. **(C)** Quantification of p-IRE1, ATF4 and ATF6 expression levels after normalization to actin expression levels.

**Fig. S8**

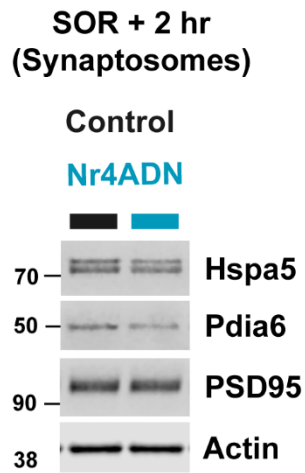

**Fig. S8. Nr4a regulates Hspa5 and Pdia6 protein levels.** Western blot showing expression of Hspa5 and Pdia6 proteins from synaptosomes obtained from dorsal hippocampus of Nr4ADN and control mice 2 hr after SOR training.



**Fig. S9**

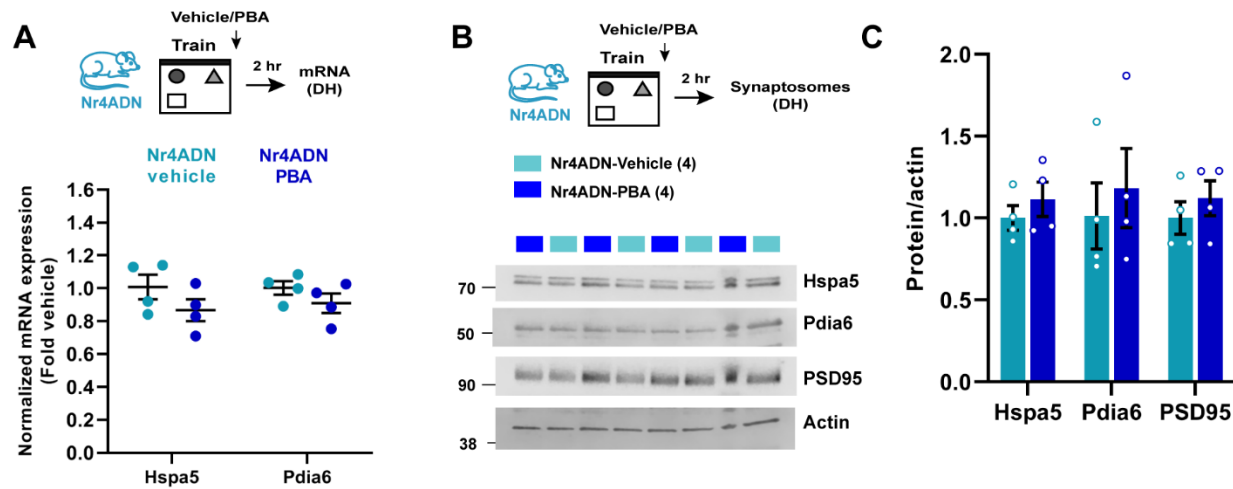

**Fig. S9. PBA treatment does not alter the expression of ER chaperones Hspa5 and Pdia6 in Nr4ADN mice. (A-C)** Nr4ADN mice were trained in SOR and injected with either PBA (200 mg/kg) or vehicle (saline) immediately after the training session. 2 hr after training, the dorsal hippocampi were extracted for analyses of gene expression and synaptosomal proteins. **(A)** Expression of the mRNAs encoding the ER chaperones *Hspa5* and *Pdia6* was unaltered between PBA- and saline-injected Nr4ADN mice. Unpaired t-test:  $t_{(6)}=1.402$ ,  $p=0.8521$  (*Hspa5*) and  $t_{(6)}=1.290$ ,  $p=0.5671$  (*Pdia6*). **(B)** Western blot of synaptosomal extracts. **(C)** Quantification of data from **B** showing that expression levels of Hspa5 and Pdia6 proteins are similar in PBA- and saline-injected Nr4ADN mice. Unpaired t-test:  $t_{(6)}=0.8800$ ,  $p=0.5878$  (*Hspa5*) and  $t_{(6)}=0.5387$ ,  $p=0.7688$ .

Fig. S10

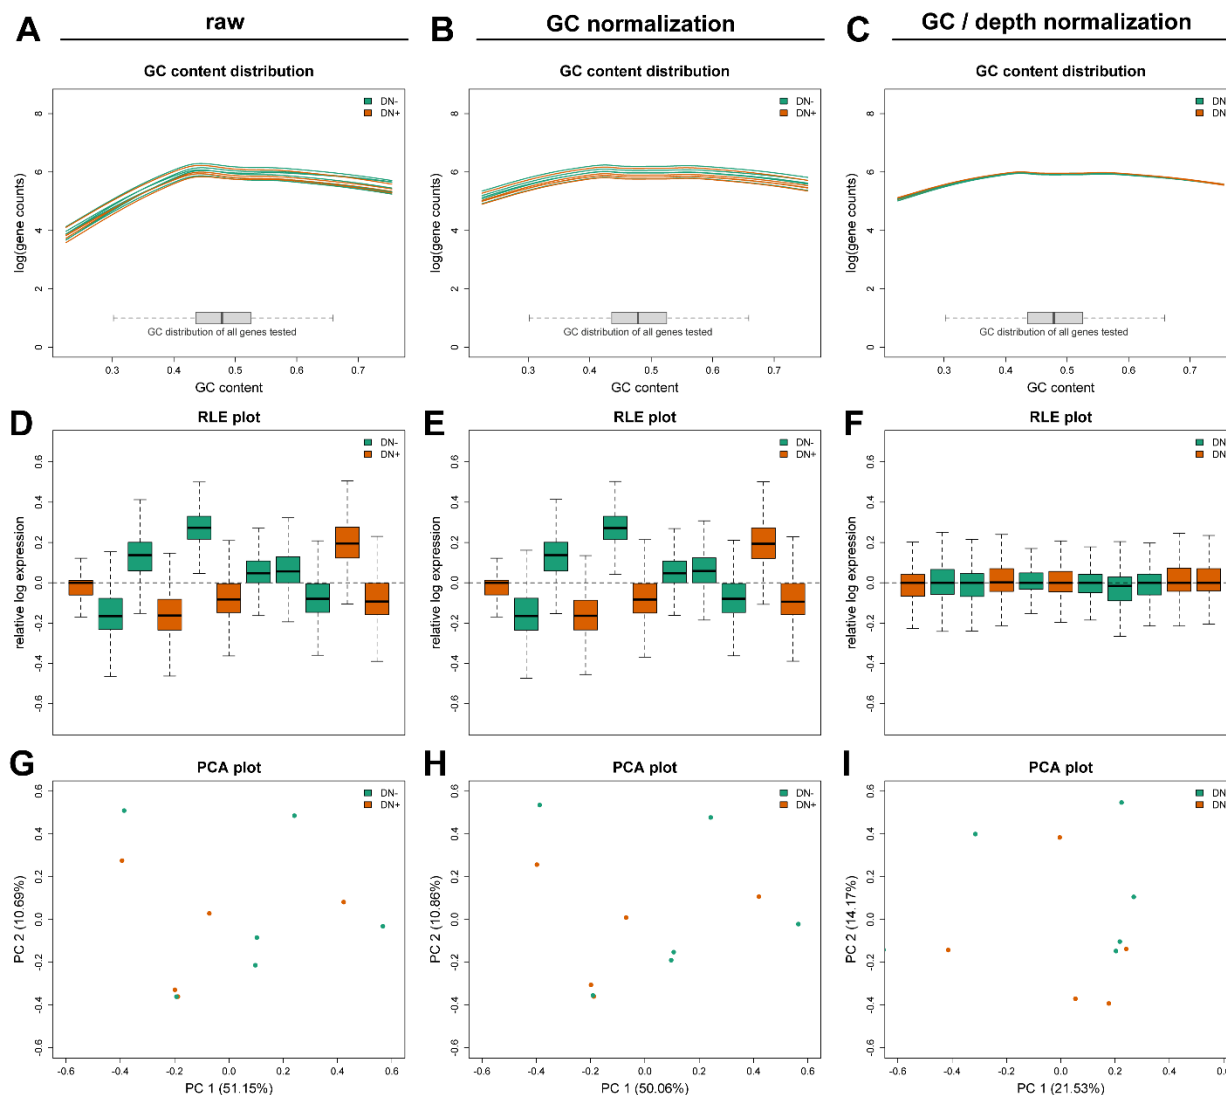

**Fig. S10. Normalization of differences in the distribution of GC content and sequencing depth using Exploratory Data Analysis and Normalization for RNA-Seq (EDASeq) for comparisons of RNAseq data for Nr4ADN and control mice after learning. (A-C)** GC content distributions before normalization (A), after full quantile GC content normalization (B), followed by upper quartile sequencing depth normalization (C). **(D-F)** Relative log expression (RLE) plots before normalization (D), after full quantile GC content normalization (E), followed by upper quartile sequencing depth normalization (F). **(G-I)** Principal component analysis (PCA) plots before normalization (G), after full quantile GC content normalization (H), followed by upper quartile sequencing depth normalization (I). DN- (Control: tTA+, Nr4ADN-) and DN+ (Nr4ADN: tTA+, Nr4ADN+).

Fig. S11

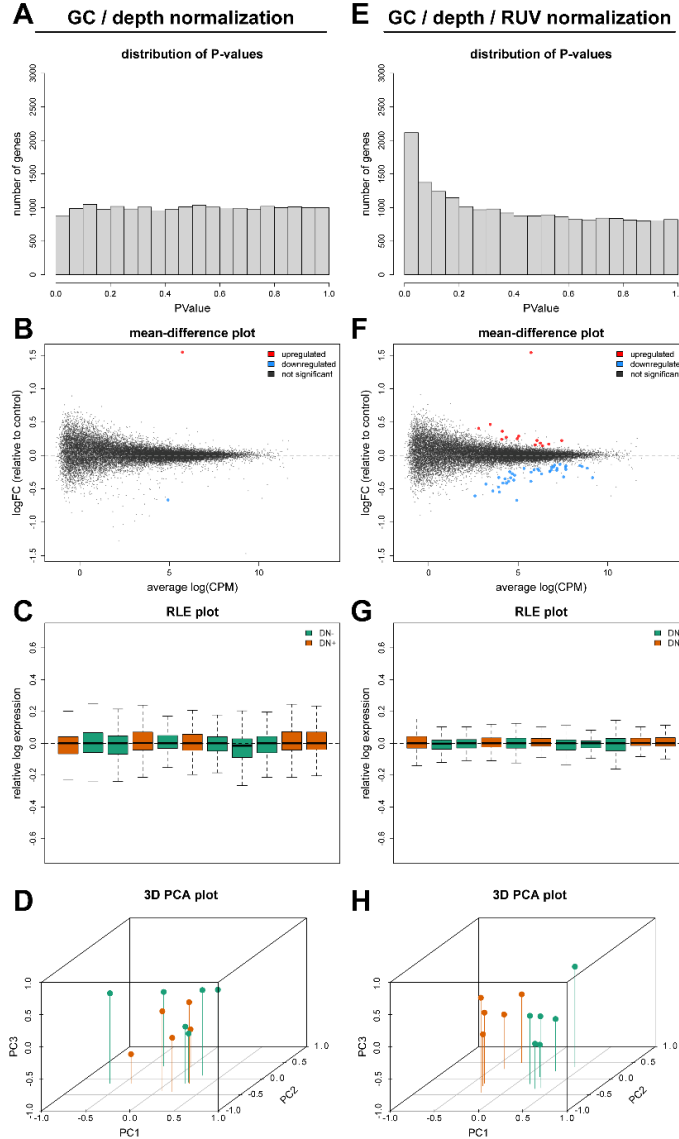

**Fig. S11. Remove Unwanted Variation (RUV) normalization for analysis of RNAseq after learning in Nr4ADN and control mice.** RUV normalization removes unwanted variation that dwarfs biological signal in RNA-sequencing data. **(A-D) Exploratory data analysis without RUV normalization.** **(A)** Uncorrected P-values from the differential expression analysis in the absence of RUV normalization are uniformly distributed and lack an expected peak at  $P < 0.05$ . **(B)** Few differences are statistically significant at a false discovery rate (FDR) of  $< 0.05$  after multiple testing correction, despite several genes showing strong fold change trends. **(C)** RLE and **(D)** PCA plots reveal that traditional normalization approaches fail to separate biologically meaningful groups using three principal components. **(E-H) Exploratory data analysis with RUV normalization.** Removing latent sources of variation allows for the separation of experimental groups and increases the power to detect statistically significant differences in gene expression. DN- (Control: tTA+, Nr4ADN-) and DN+ (Nr4ADN: tTA+, Nr4ADN+).

Fig. S12

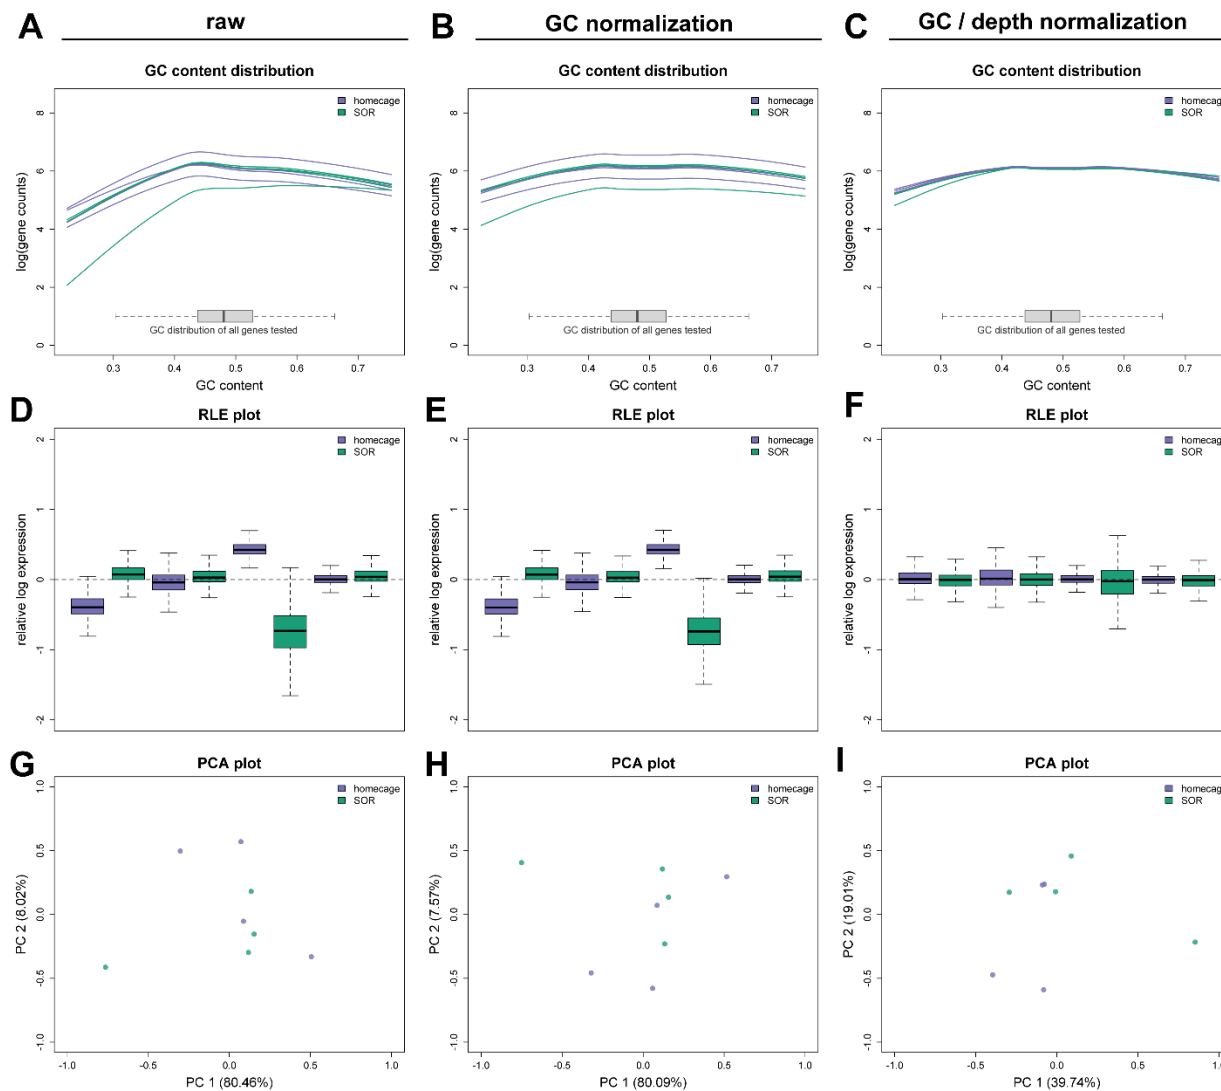

**Fig. S12. Normalization of differences in GC content distribution and sequencing depth using EDASeq for comparisons of RNAseq studies between homecage control mice and trained control mice. (A-C)** GC content distributions before normalization (A), after full quantile GC content normalization (B), followed by upper quartile sequencing depth normalization (C). **(D-F)** Relative log expression (RLE) plots before normalization (D), after full quantile GC content normalization (E), followed by upper quartile sequencing depth normalization (F). **(G-I)** Principal component analysis (PCA) plots before normalization (G), after full quantile GC content normalization (H), followed by upper quartile sequencing depth normalization (I).

Fig. S13

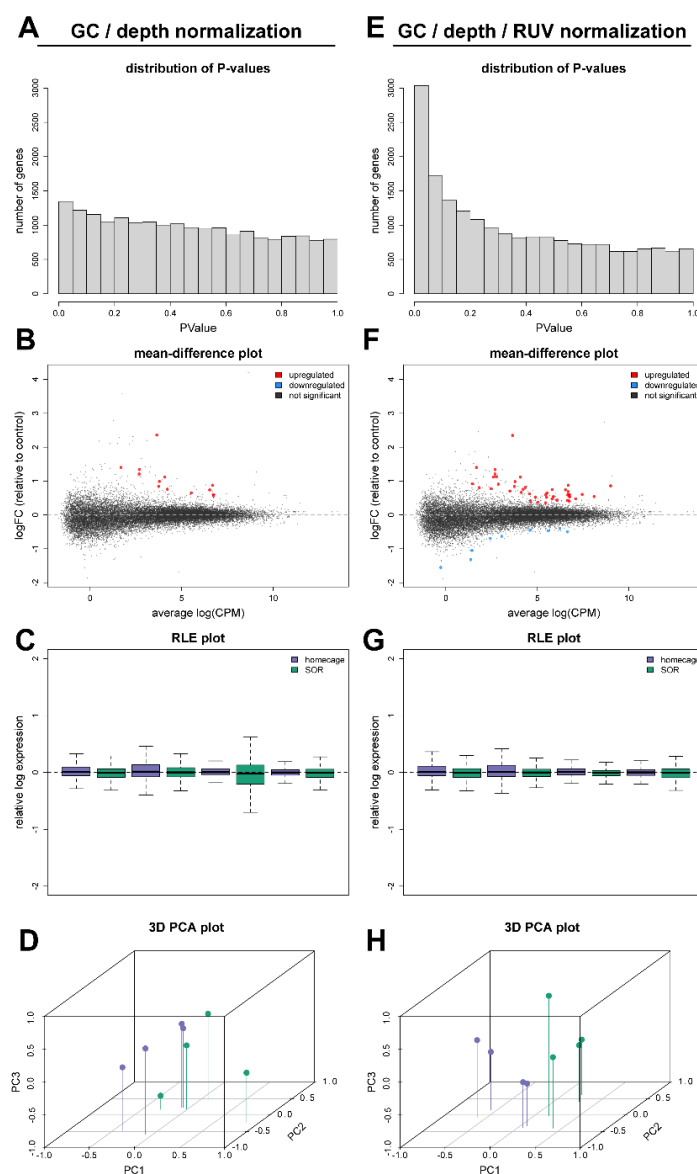

**Fig. S13. RUV normalization for analysis of RNAseq between homecage control mice and trained control mice.** RUV normalization removes unwanted variation that confounds biological signals in RNA-sequencing data. **(A-D), Exploratory data analysis without RUV normalization.** **(A)** Uncorrected P-values from the differential expression analysis in the absence of RUV normalization are uniformly distributed and lack an expected peak at  $P < 0.05$ . **(B)** Few differences are statistically significant at a false discovery rate (FDR) of  $< 0.05$  after multiple testing correction, despite several genes showing strong fold change trends. **(C)** RLE and **(D)** PCA plots reveal that traditional normalization approaches fail to separate biologically meaningful groups using three principal components. **(E-H), Exploratory data analysis with RUV normalization.** Removing latent sources of variation allows for the separation of experimental groups and increases the power to detect statistically significant differences in gene expression.

## References

1. J. D. Hawk *et al.*, NR4A nuclear receptors support memory enhancement by histone deacetylase inhibitors. *J Clin Invest* **122**, 3593-3602 (2012).
2. L. O. Goodwin *et al.*, Large-scale discovery of mouse transgenic integration sites reveals frequent structural variation and insertional mutagenesis. *Genome Res* **29**, 494-505 (2019).
3. H. H. Engelhard, R. J. Homer, H. A. Duncan, J. Rozental, Inhibitory effects of phenylbutyrate on the proliferation, morphology, migration and invasiveness of malignant glioma cells. *J Neurooncol* **37**, 97-108 (1998).
4. R. Havekes *et al.*, Transiently increasing cAMP levels selectively in hippocampal excitatory neurons during sleep deprivation prevents memory deficits caused by sleep loss. *J Neurosci* **34**, 15715-15721 (2014).
5. A. Vogel-Ciernia, M. A. Wood, Examining object location and object recognition memory in mice. *Curr Protoc Neurosci* **69**, 8 31 31-17 (2014).
6. M. S. Shetty *et al.*, Investigation of Synaptic Tagging/Capture and Cross-capture using Acute Hippocampal Slices from Rodents. *J Vis Exp*, (2015).
7. S. Chatterjee *et al.*, Reinstating plasticity and memory in a tauopathy mouse model with an acetyltransferase activator. *EMBO Mol Med* **10**, (2018).
8. A. Dobin *et al.*, STAR: ultrafast universal RNA-seq aligner. *Bioinformatics* **29**, 15-21 (2013).
9. Y. Liao, G. K. Smyth, W. Shi, featureCounts: an efficient general purpose program for assigning sequence reads to genomic features. *Bioinformatics* **30**, 923-930 (2014).
10. R. C. Team, R: A language and environment for statistical computing. . *R Foundation for Statistical Computing, Vienna, Austria.*, (2019).
11. D. Risso, K. Schwartz, G. Sherlock, S. Dudoit, GC-content normalization for RNA-Seq data. *BMC Bioinformatics* **12**, 480 (2011).
12. D. Risso, J. Ngai, T. P. Speed, S. Dudoit, Normalization of RNA-seq data using factor analysis of control genes or samples. *Nat Biotechnol* **32**, 896-902 (2014).
13. L. Peixoto *et al.*, How data analysis affects power, reproducibility and biological insight of RNA-seq studies in complex datasets. *Nucleic Acids Res* **43**, 7664-7674 (2015).
14. M. D. Robinson, D. J. McCarthy, G. K. Smyth, edgeR: a Bioconductor package for differential expression analysis of digital gene expression data. *Bioinformatics* **26**, 139-140 (2010).
15. D. J. McCarthy, Y. Chen, G. K. Smyth, Differential expression analysis of multifactor RNA-Seq experiments with respect to biological variation. *Nucleic Acids Res* **40**, 4288-4297 (2012).
16. Y. Chen, A. T. Lun, G. K. Smyth, From reads to genes to pathways: differential expression analysis of RNA-Seq experiments using Rsubread and the edgeR quasi-likelihood pipeline. *F1000Res* **5**, 1438 (2016).
17. G. Bindea *et al.*, ClueGO: a Cytoscape plug-in to decipher functionally grouped gene ontology and pathway annotation networks. *Bioinformatics* **25**, 1091-1093 (2009).
18. P. Shannon *et al.*, Cytoscape: a software environment for integrated models of biomolecular interaction networks. *Genome Res* **13**, 2498-2504 (2003).
19. N. T. Doncheva, J. H. Morris, J. Gorodkin, L. J. Jensen, Cytoscape StringApp: Network Analysis and Visualization of Proteomics Data. *J Proteome Res* **18**, 623-632 (2019).
20. D. Szklarczyk *et al.*, STRING v10: protein-protein interaction networks, integrated over the tree of life. *Nucleic Acids Res* **43**, D447-452 (2015).
21. X. Liu *et al.*, Genome-wide analysis identifies NR4A1 as a key mediator of T cell dysfunction. *Nature* **567**, 525-529 (2019).
22. S. Kaech, G. Banker, Culturing hippocampal neurons. *Nat Protoc* **1**, 2406-2415 (2006).



23. J. A. Miller *et al.*, Neuropathological and transcriptomic characteristics of the aged brain. *Elife* **6**, (2017).
